# Supplementary material
Source: PubMed Central journal article supplement (PMC5470045)
Supplement: EMBJ-36-1736-s001.pdf [file EMBJ-36-1736-s001.pdf]

## **Appendix:**

### **Sphingolipid metabolic flow controls phosphoinositide turnover at the *trans* Golgi network.**

Serena Capasso, Lucia Sticco, Riccardo Rizzo, Marinella Pirozzi, Domenico Russo, Nina A. Dathan, Felix Campelo, Josse van Galen, Maarit Hölttä-Vuori, Gabriele Turacchio, Angelika Hausser, Vivek Malhotra, Isabelle Riezman, Howard Riezman, Elina Ikonen, Chiara Luberto, Seetharaman Parashuraman, Alberto Luini, and Giovanni D'Angelo

Contains:

Appendix figures and figure legends S1-S16

Appendix Tables S1-S3

**Appendix figures:**

**Appendix Figure S1**

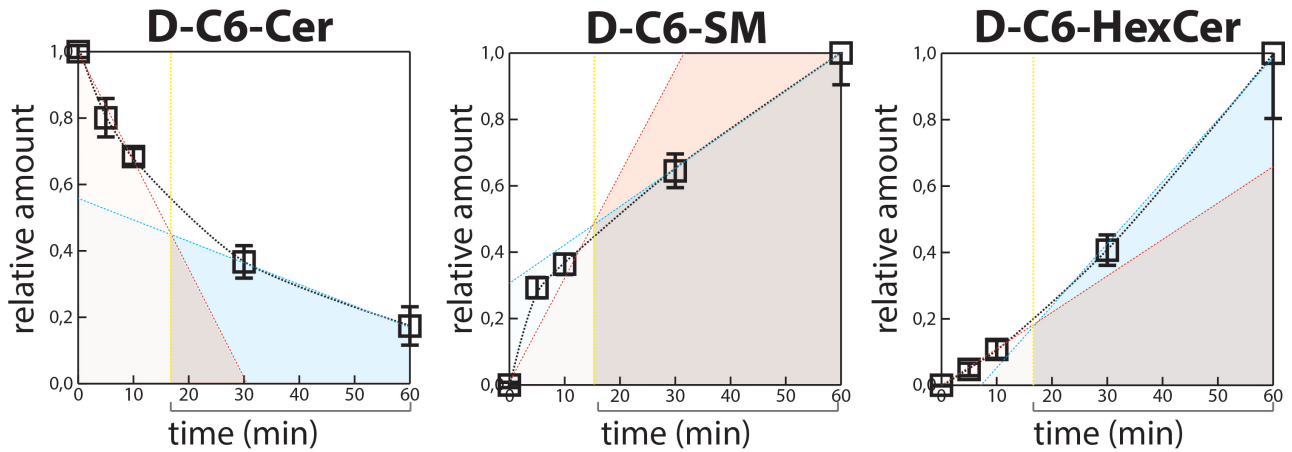

**Appendix figure S1:** *Dynamics of cell response to SL flow.*

HeLa cells treated with FB1 (50 $\mu$ M) for 24 hours were fed with C6-D-Cer (10 $\mu$ M) for the indicated times. The amounts of C6-D-Cer (left panel), C6-D-SM (middle panel), and C6-D-HexCer (right panel) were measured by Mass Spectrometry following lipid extraction and HPLC separation and are reported as relative amounts over time. Red and cyan dashed lines indicate the early and late conversion/ synthetic rates of the different metabolites. Data are means  $\pm$  S.D. from 3 independent experiments.

## Appendix Figure S2

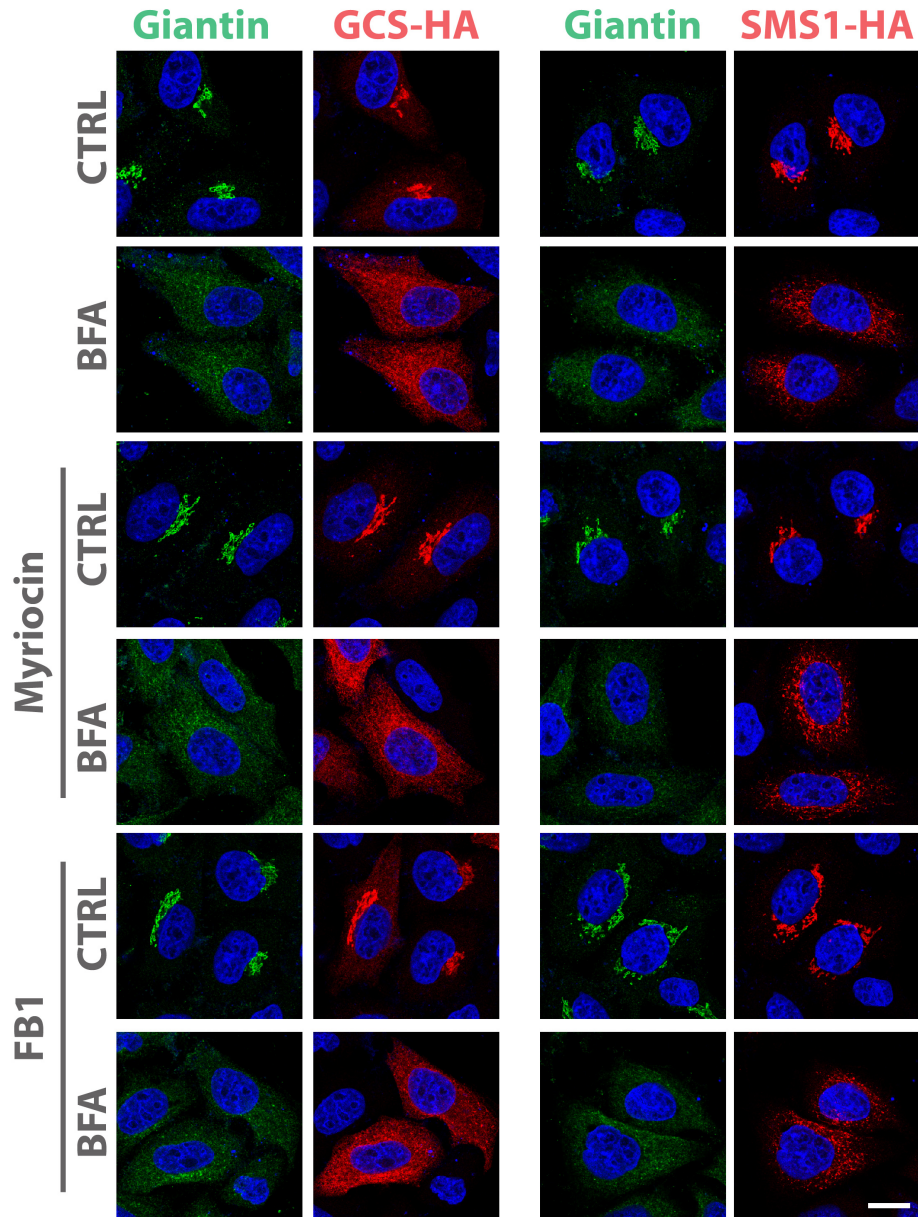

**Appendix figure S2: SMS1 and GCS are redistributed to the ER under BFA treatment.**

Cells expressing HA- tagged versions of GCS or SMS1 were either incubated with vehicle or with SL inhibitors myriocin (2.5  $\mu\text{M}$ ) or FB1 (50  $\mu\text{M}$ ) for 24 hours. Subsequently cells were treated with BFA (5 $\mu\text{g}/\text{mL}$ ) for 30 min, fixed and processed for immunofluorescence. Images show the subcellular distribution of GCS-HA and SMS1-HA (red) compared to that of the Golgi marker Giantin (green) under the different treatment conditions. Note that both GCS and SMS1 are predominantly located to the Golgi complex, and that both are redistributed to the ER under BFA administration irrespective of myriocin or FB1 treatments. Bar, 10  $\mu\text{m}$ .

## Appendix Figure S3

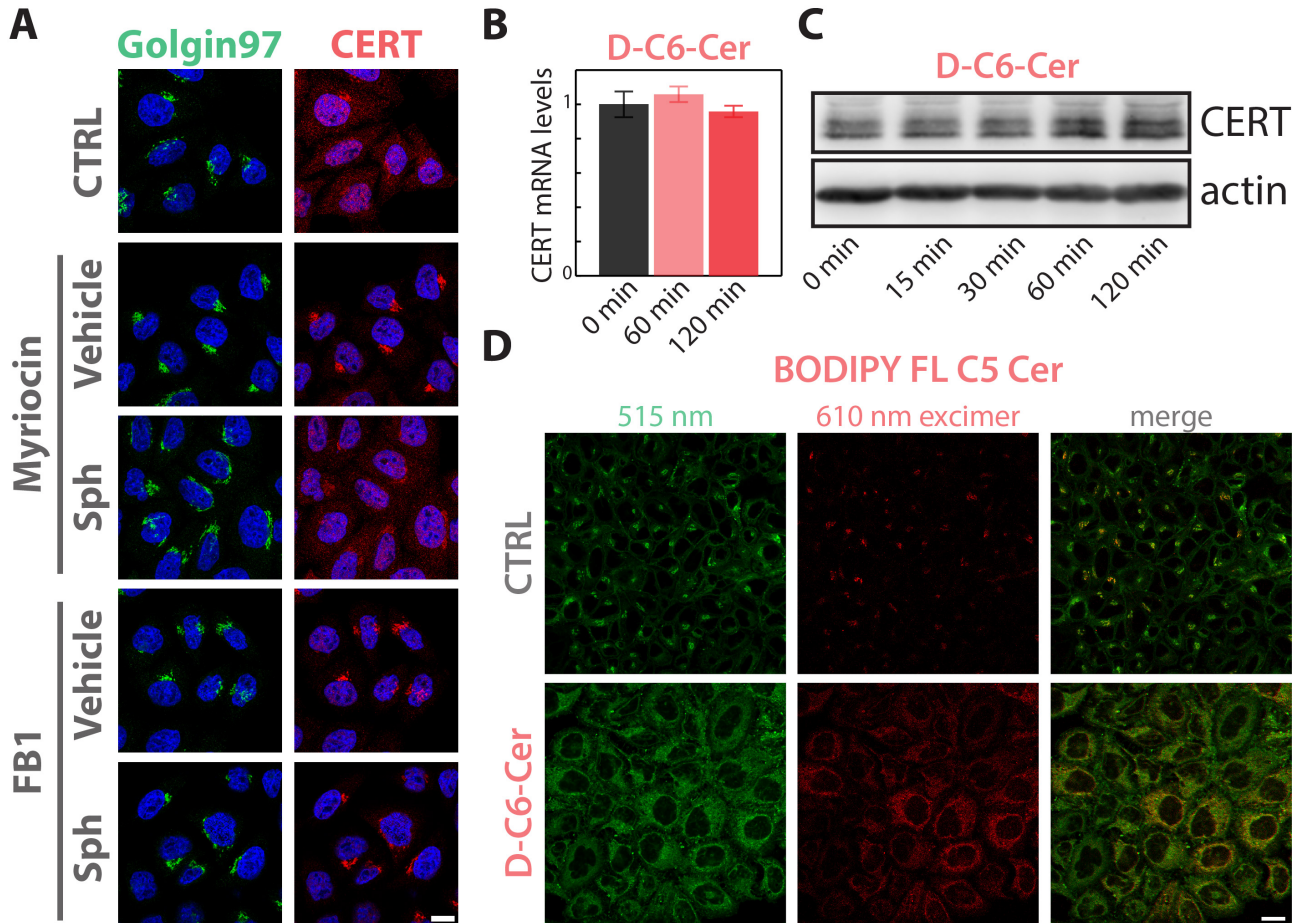

**Appendix figure S3:** *CERT association to Golgi membranes depends on SL synthetic flow.*

**A)** CERT localisation in HeLa cells, either non-treated (CTRL), treated with myriocin (2.5  $\mu$ M for 24 hours) or FB1 (50 $\mu$ M for 24 hours), or treated with 30 $\mu$ M D-Sph for 2 hours after 24 hours treatment with myriocin or FB1. CERT is in red, the TGN marker Golgin 97 is in green, DAPI is in blue. Bar, 10  $\mu$ m. Note that D-Sph treatment reverts myriocin induced CERT recruitment to the Golgi while it has no effect on FB1 induced recruitment, suggesting that D-Sph conversion to D-Cer is required for CERT displacement. **B)** CERT normalized mRNA levels as assessed by qPCR in HeLa cells treated for the indicated times with C6-D-Cer (10 $\mu$ M). **C)** CERT protein levels as assessed by immunoblotting in HeLa cells treated for the indicated times with C6-D-Cer (10 $\mu$ M). Data are means  $\pm$  S.E.M. of at least 3 independent experiments. **D)** HeLa cells either non-treated (CTRL) or pre-treated for 2 hours with C6-D-Cer (10 $\mu$ M), were assayed for their capability to concentrate BODIPY-FL-C5-Cer to the perinuclear region. Monomer (515 nm; Green) and excimer (610 nm; Red) emissions are reported. Bar, 10  $\mu$ m.



## Appendix Figure S4

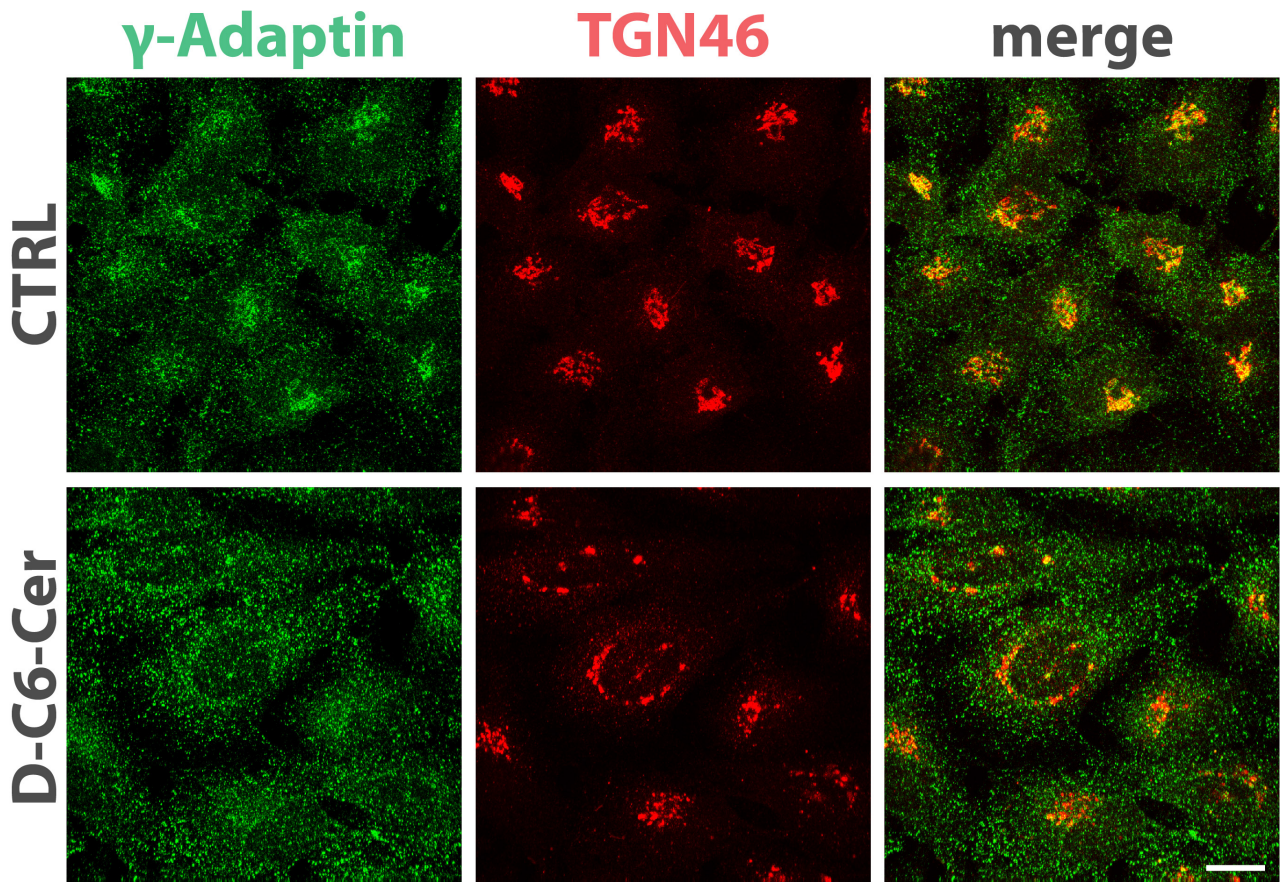

**Appendix figure S4:**  *$\gamma$ -Adaptin association to the Golgi is sensitive to the SL flow.*

Cells were treated as in **Figure 2A**, fixed and stained for  $\gamma$ -Adaptin (green) and TGN46 (red). Bar, 10  $\mu$ m.

## Appendix Figure S5

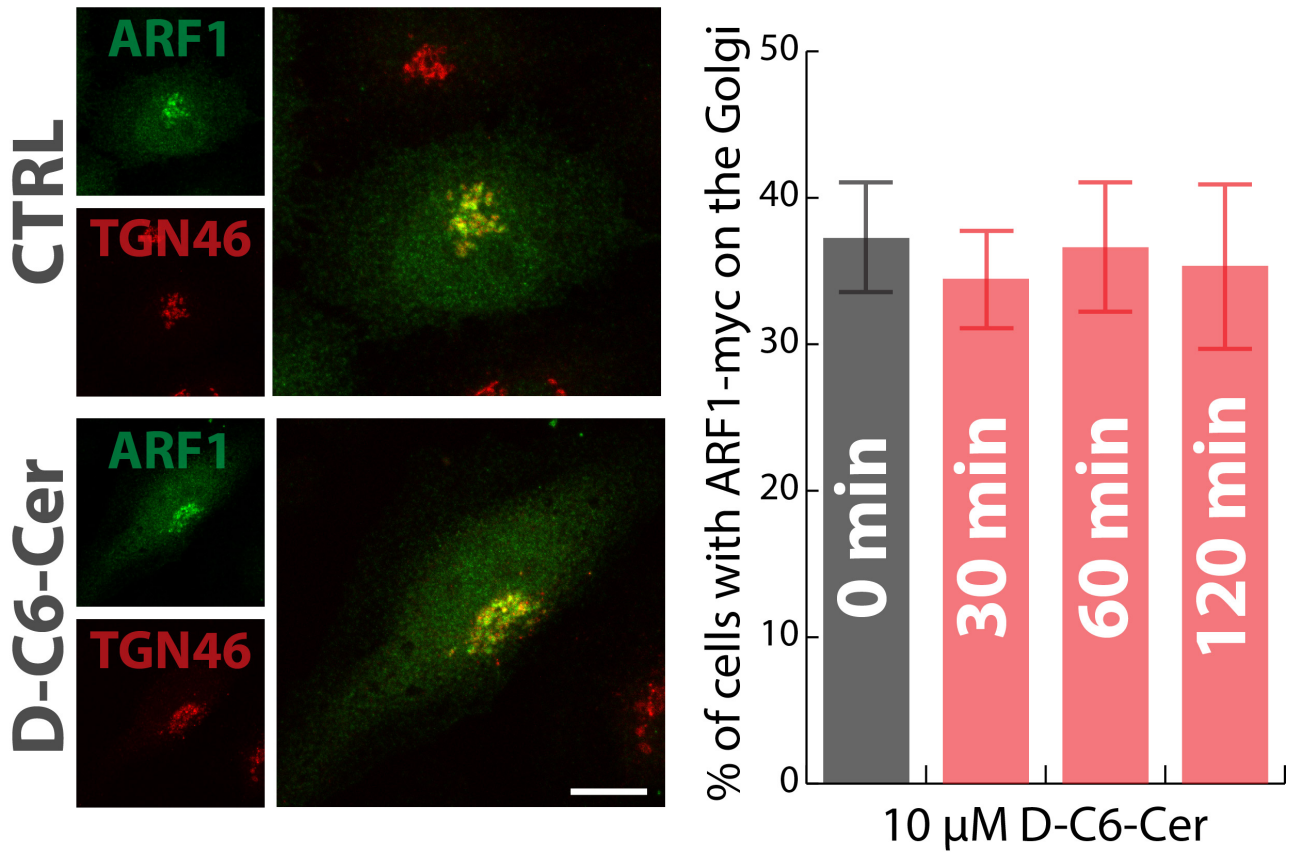

**Appendix figure S5:** *Arf1* localization to the Golgi complex is not affected by SL flow.

Cells expressing a myc-tagged version of ARF1 (ARF1-myc), were treated either with EtOH or D-C6-Cer (10μM) for different times (30, 60, and 120 min). Cells were then fixed and stained with anti-myc antibody (green) and with an anti-TGN46 antibody (red) (left panel). The percentage of transfected cells having ARF1-myc localized to the Golgi is indicated at different time points. Data are means of at least 3 independent experiments  $\pm$  S.D.. Bar, 10 μm.

## Appendix Figure S6

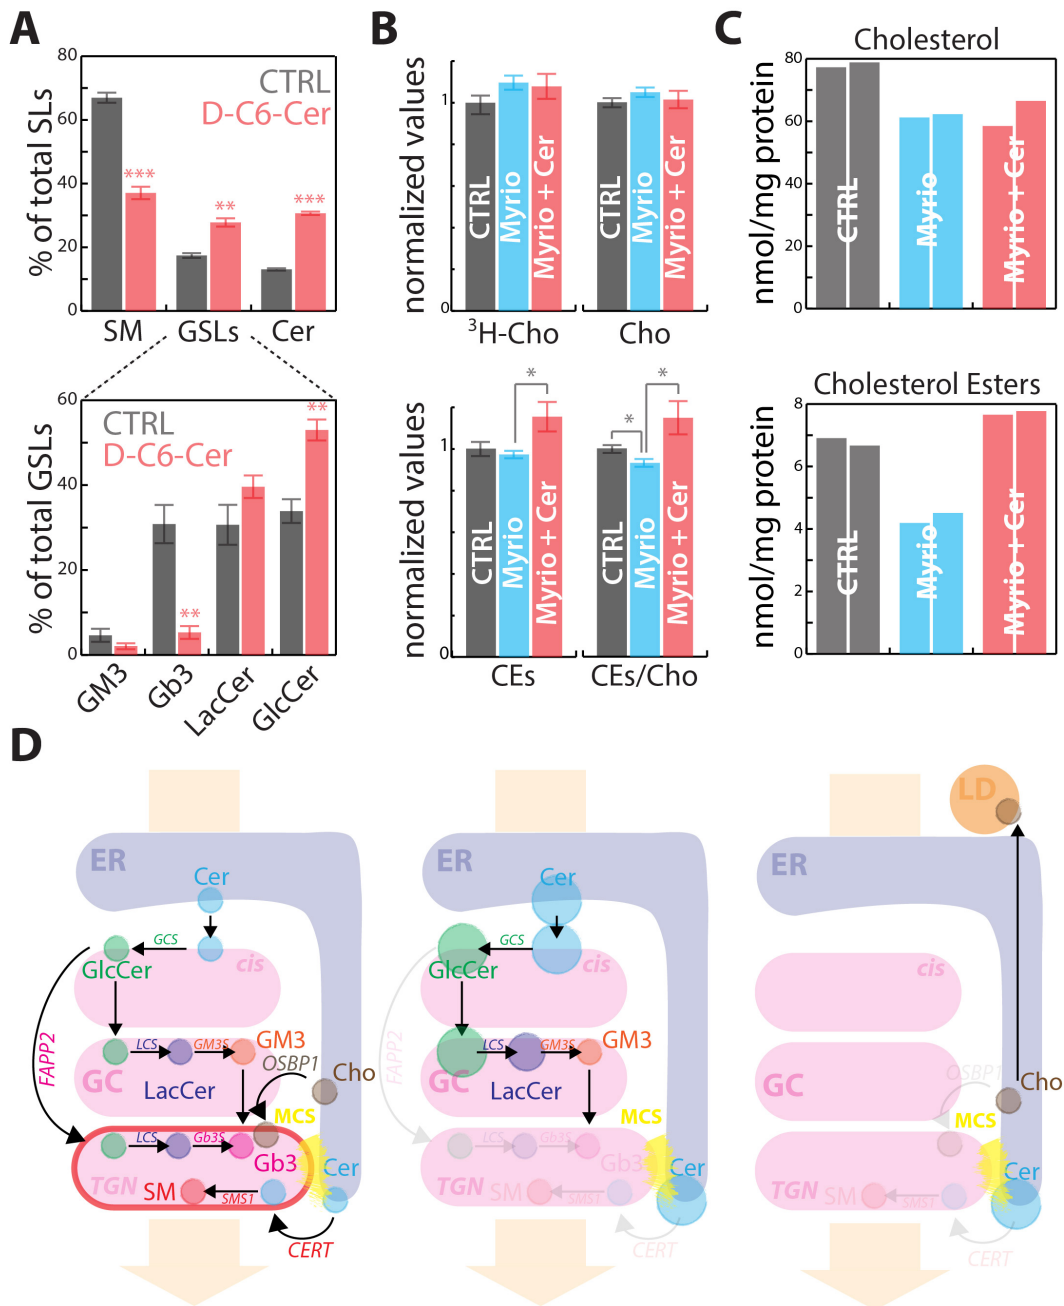

**Appendix figure S6: SL flow controls GSLs and sterol metabolism.**

**A)** Cells treated either with vehicle (EtOH), D-C6-Cer (10 $\mu$ M, 2 hours) were pulse labelled with  $^3$ H-D-Sph for SL and GSL synthesis assessment. The percentage of total radioactivity associated with SM, Cer and GSLs (i.e., GlcCer, LacCer, Gb3, and GM3) in the different conditions was quantitated after lipid extraction and HPTLC separation (upper panel). The percentage of GSLs radioactivity associated with GlcCer, LacCer, Gb3, and GM3 in the different conditions is also reported. Data are means  $\pm$  S.E.M. of 4 independent experiments. **B)** Cells were treated overnight with vehicle or myriocin (2.5  $\mu$ M), followed by

2h labelling with  $^3\text{H}$ -acetate and 4 h chase in the presence or absence of myriocin and D-C6-Cer (10  $\mu\text{M}$ ) as indicated. The  $^3\text{H}$ -radioactivity associated with free cholesterol ( $^3\text{H}$ -Cho), the amount of unlabelled free cholesterol (Cho), and cholesterol esters (CEs) were analyzed after lipid extraction and HPTLC separation. CEs/ Cho ratio in the different conditions is also reported. Data are means  $\pm$  S.E.M. of at least 7 independent experiments. **C)** Cells were treated overnight with vehicle or myriocin (2.5  $\mu\text{M}$ ) followed by 4 h chase in the presence or absence of D-C6-Cer (10  $\mu\text{M}$ ) as indicated. The amount of free cholesterol (Cho), and cholesterol esters (CEs) were analyzed by mass spectrometry after lipid extraction and gas chromatography separation. **D)** Schematic representation of the effect of sustained SL flow on CERT, FAPP2, and OSBP1 dependent lipid transport. ER, endoplasmic reticulum; GC, Golgi complex; TGN, trans Golgi Network; LD, lipid droplets.

## Appendix Figure S7

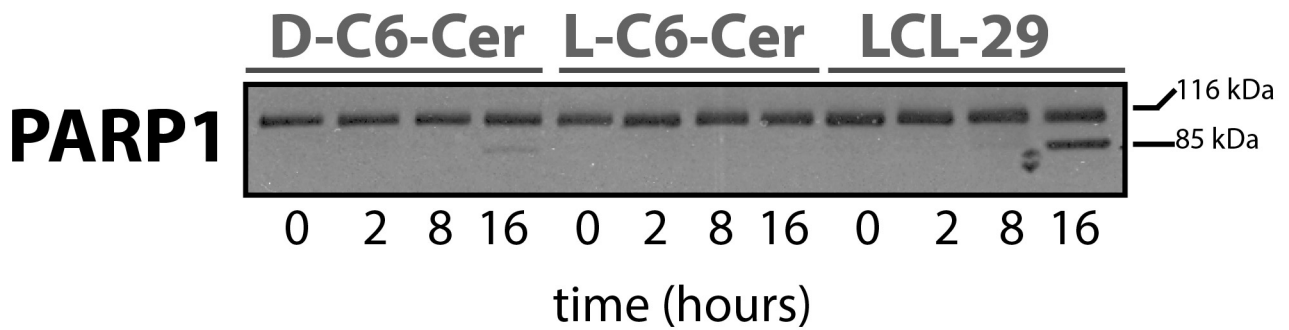

**Appendix figure S7:** Sustained SL flow controls *PtdIns(4)P* at the TGN independently from pro-apoptotic signalling.

HeLa Cells treated either with D-C6-Cer, L-C6-Cer, or LCL-29 (10 $\mu$ M) for the indicated times were lysed and lysates subjected to SDS-PAGE and immunoblotting with anti PARP1 antibody to evaluate caspase-dependent PARP1 cleavage (appearance of the 85 kDa PARP1 fragment).



## Appendix Figure S8

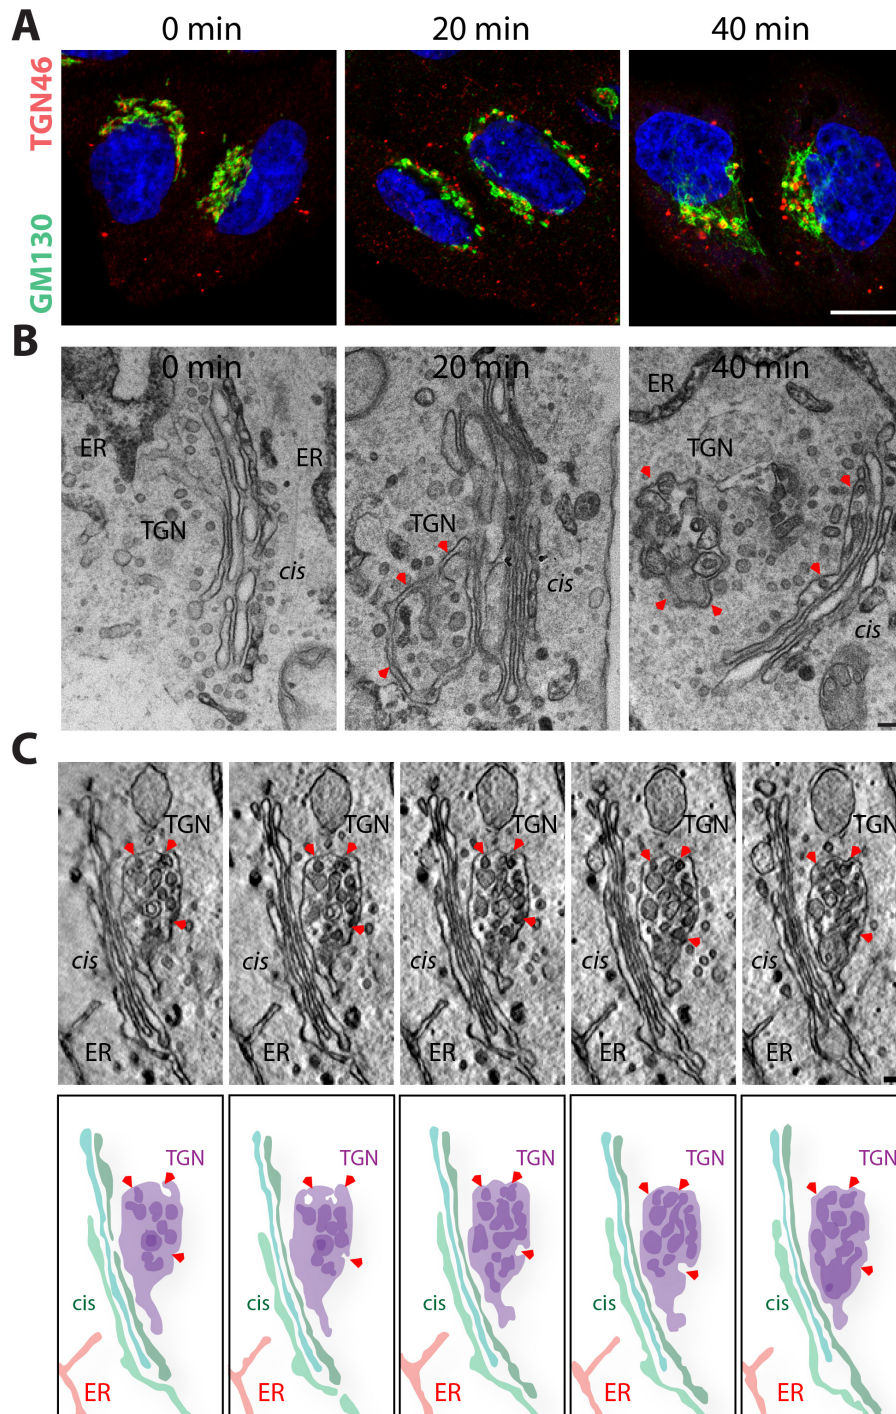

**Appendix figure S8: Sustained SL flow specifically affects TGN structure.**

**A)** Cells treated either with vehicle (EtOH), or D-C6-Cer (10 $\mu$ M) for the indicated times were fixed and stained with antibodies directed against *cis*-Golgi (GM130, green) and TGN (TGN46, red) markers. Bar, 10 $\mu$ m. **B)** Cells transfected with HRP-KDEL (to stain ER and *cis*-Golgi membranes by DAB reaction) were treated as in **(A)** fixed and processed for

electron microscopy as detailed in **Methods**. Red arrowheads indicate cisternal curling (middle panel) and multi-vesiculated structures at the *trans* Golgi pole and at the TGN (left panel). Bar, 100nm. **C)** Electron tomographic frames (upper panels) and graphic representation (lower panels) of a Golgi stack from a cell treated for 30 min with D-C6-Cer (10 $\mu$ M). Red arrowheads indicate inward budding events. Bar, 100nm.

## Appendix Figure S9

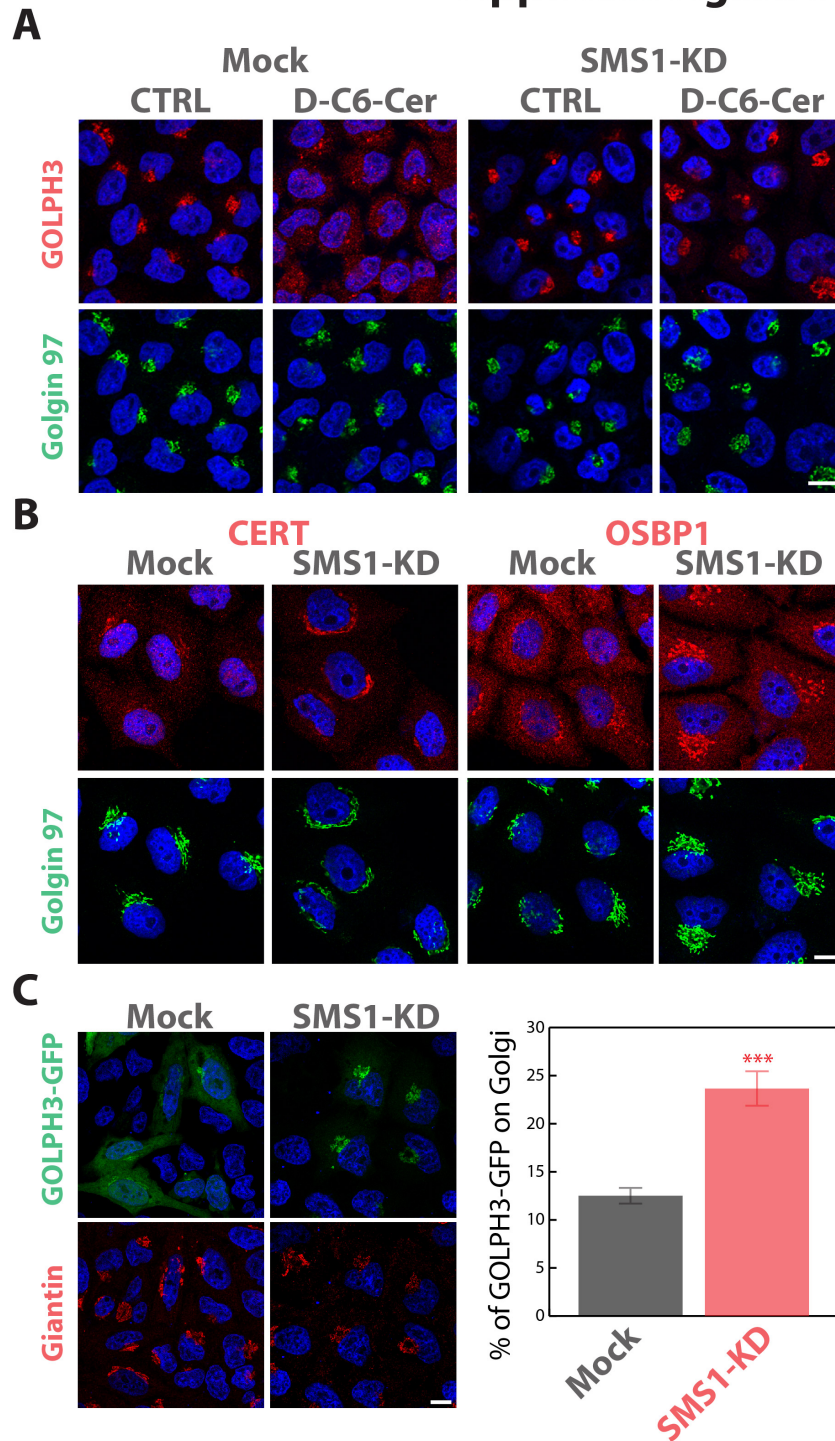

**Appendix figure S9: SM synthesis controls *PtdIns(4)P* binding proteins association to the TGN**

**A)** SMS1-KD cells were treated with either with EtOH (CTRL), or D-C6-Cer (10 $\mu$ M) for 2 hours, fixed, and stained with DAPI (blue), an anti-Golgin97 antibody (green) and anti-GOLPH3 antibody (red). **B)** Cells either mock treated or SMS1-KD were fixed, and stained with DAPI (blue), an anti-Golgin97 antibody (green) and either anti CERT or anti OSBP1

antibodies (red). **C)** SMS1-KD cells were transfected with GFP- tagged GOLPH3 fixed, and stained with DAPI (blue), and anti-Giantin antibody (red). The percentage of GOLPH3-GFP associated with the Golgi is reported in mock interfered (n=27) and SMS1-KD cells (n=27). Data are means  $\pm$  S.E.M.



## Appendix Figure S10

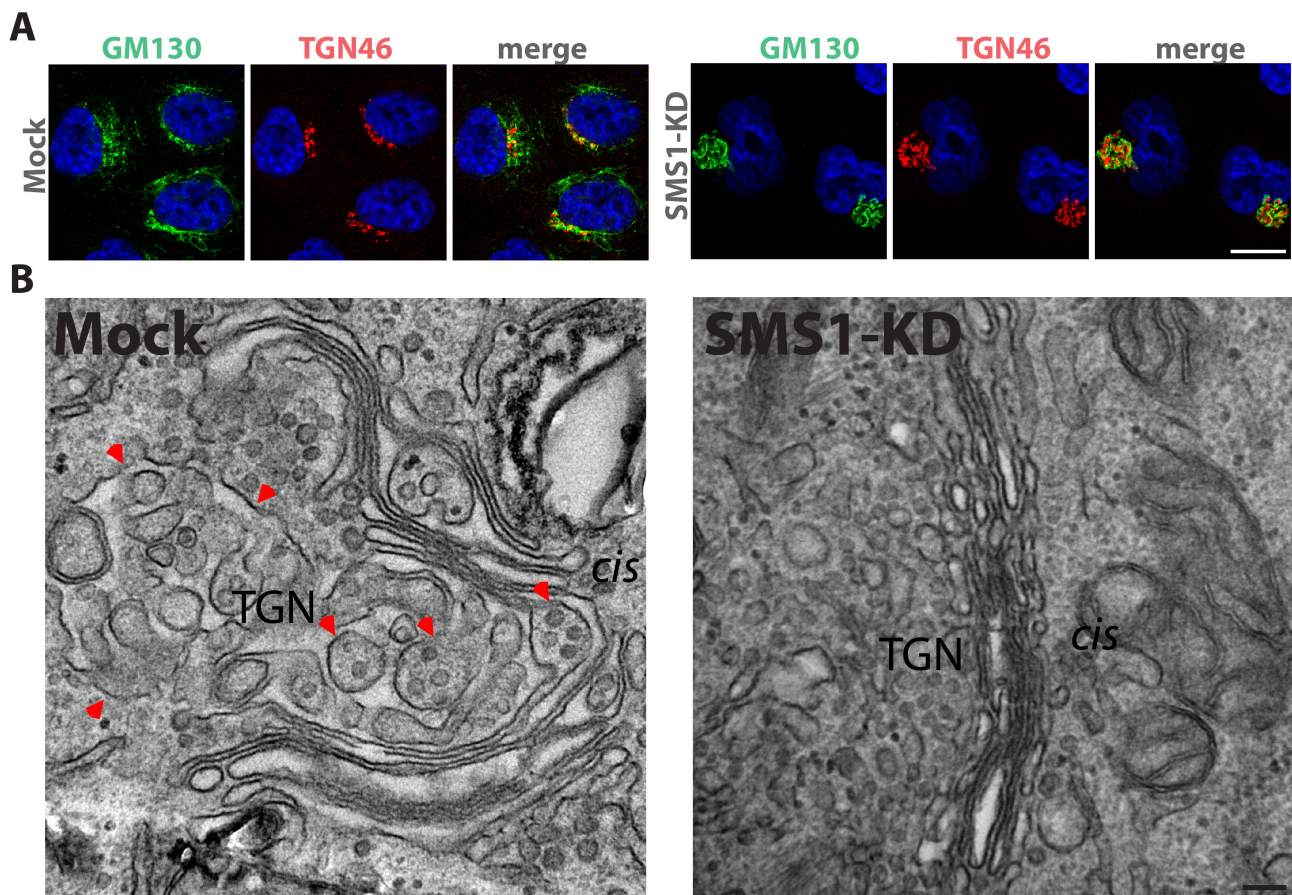

**Appendix figure S10: Cer to SM conversion affects TGN structure.**

**A)** Cells mock treated or SMS1-KD were treated with D-C6-Cer (10 $\mu$ M) for 2 hours, fixed, and stained with antibodies directed against *cis*-Golgi (GM130, green) and TGN (TGN46, red) markers. Bar, 10 $\mu$ m. **B)** Cells mock treated or SMS1-KD were treated as in **(A)** fixed and processed for electron microscopy as detailed in **Methods**. Red arrowheads indicate cisisternal curling and multi-vesiculated structures at the *trans* Golgi pole and at the TGN characteristic of D-C6-Cer treated cells. Bar, 100nm.



## Appendix Figure S11

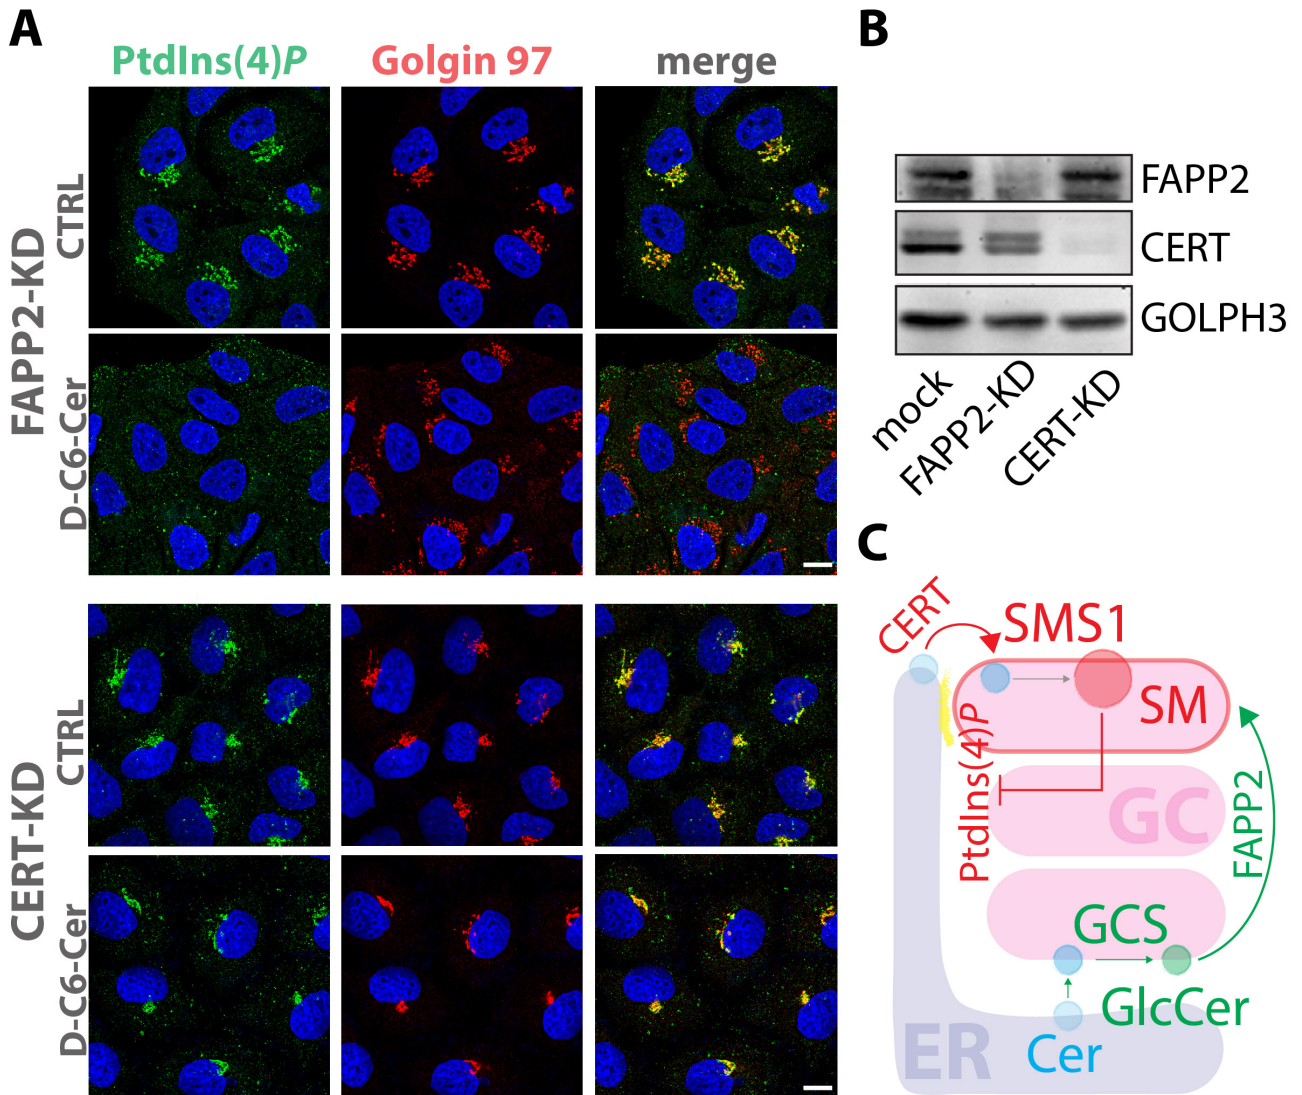

**Appendix figure S11: The CERT-SMS1 axis controls PtdIns(4)P levels at the TGN**

**A)** Cells treated with FAPP2 or CERT directed siRNAs were treated either with EtOH, or D-C6-Cer (10 $\mu$ M) for 30 min, fixed, permeabilized and stained with DAPI (blue), an anti-Golgin97 antibody (red) and a specific anti PtdIns(4)P-antibody (green; left panels). Bars, 10  $\mu$ m. **B)** FAPP2 and CERT KD efficiencies were evaluated by Western Blotting. **C)** Schematic representation of CERT-SMS1 axis control on TGN PtdIns(4)P.

## Appendix Figure S12

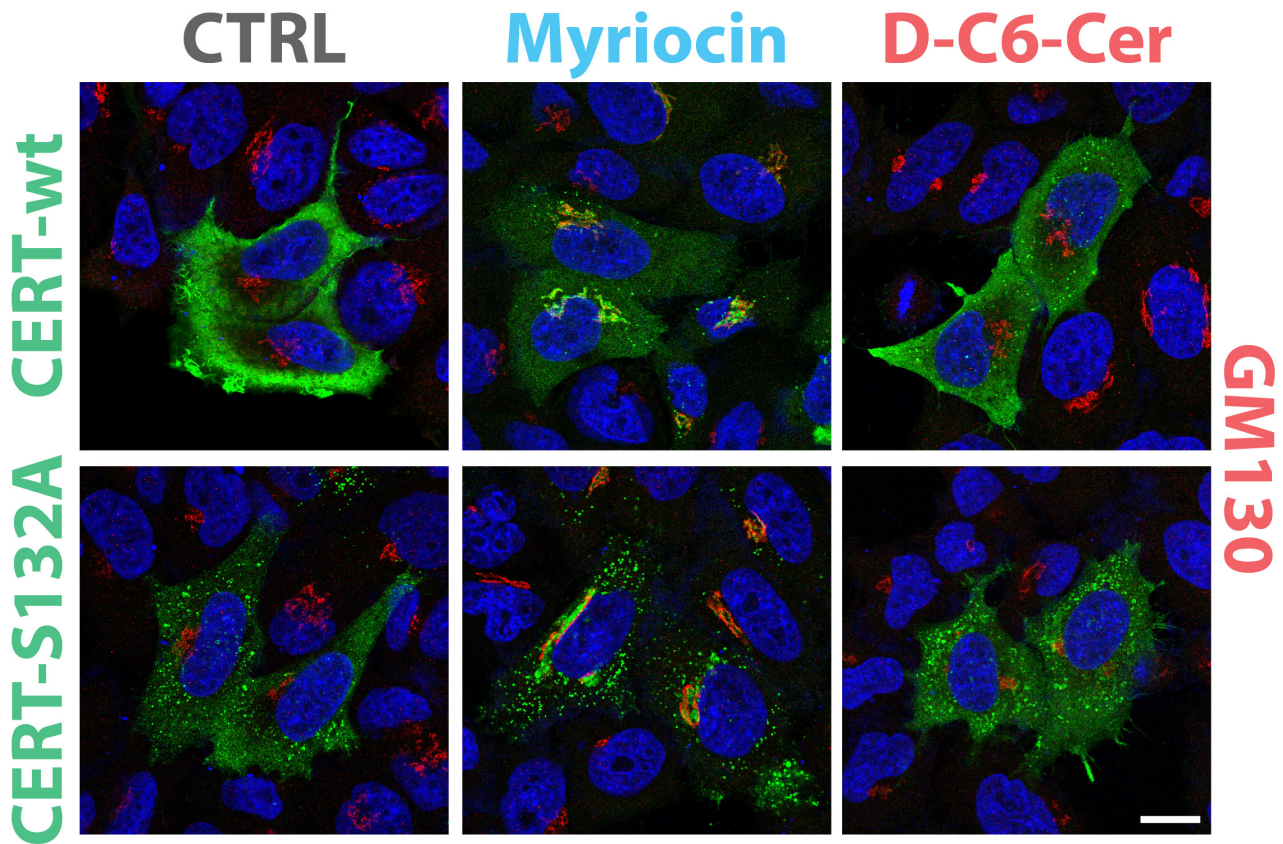

**Appendix figure S12:** *PKD phosphorylation on CERT minimally influences CERT localization in response to sustained SL flow.*

Cells expressing Flag-tagged CERT-wt or CERT-S132A were either non-treated (CTRL, grey), treated with myriocin (2.5  $\mu$ M, 24 hours) (myriocin, cyan), or pre-treated with myriocin (2.5  $\mu$ M, 24 hours), and then treated with D-C6-Cer (10 $\mu$ M) for 2 hours (D-C6-Cer; red). After fixation cells were stained with DAPI (blue) anti-Flag (green), and anti-GM130 (red) antibodies. Bar, 10  $\mu$ m.



## Appendix Figure S13

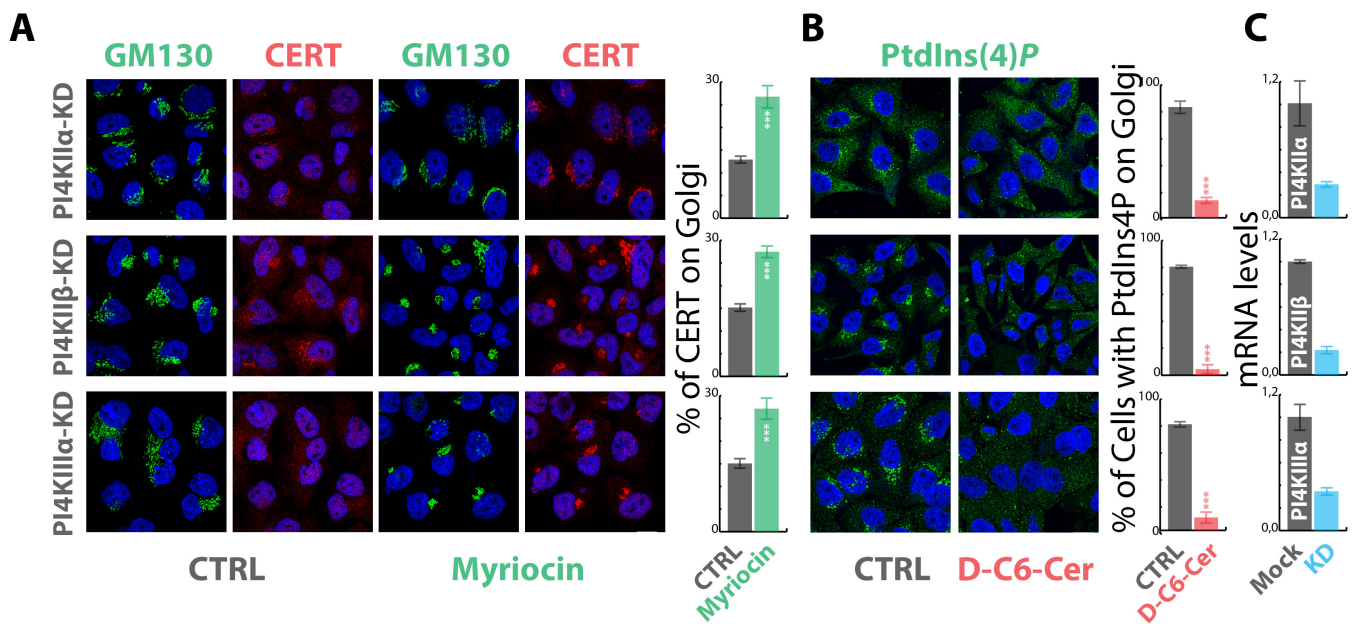

**Appendix figure S13:** *Other PI4Ks do not control the Golgi PtdIns4P pool in response to SL flow*

Cells silenced for the expression of PI4KII $\alpha$ , PI4KII $\beta$ , or PI4KIII $\alpha$  were treated with **A**) myriocin (2,5  $\mu$ M; 24 hours) or **B**) with D-C6-Cer (10 $\mu$ M; 60 min). In **(A)** CERT recruitment to the Golgi region was evaluated by immunofluorescence and quantitated as in **Figure 1C**. In **(B)** PtdIns(4)P consumption under D-C6-Cer (10 $\mu$ M, 1 hour) was evaluated as in **Figure 4A**. **C**) The KD efficiency for PI4KII $\alpha$ , PI4KII $\beta$ , and PI4KIII $\alpha$  is assessed by RT qPCR (right histograms). Bars, 10  $\mu$ m. Data are means  $\pm$  S.E.M, of at least 3 independent experiments.

## Appendix Figure S14

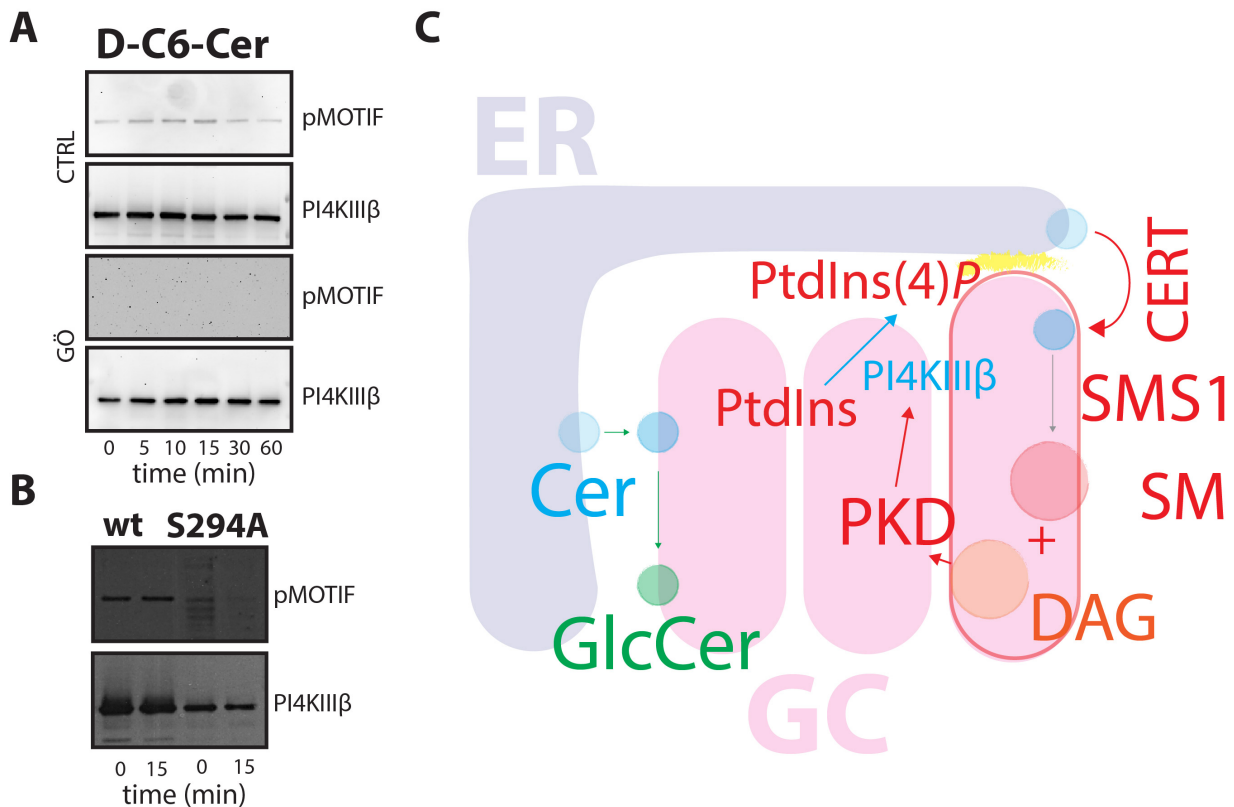

### Appendix figure S14: *PI4KIIIβ* response to *SL* flow

**A)** Cells expressing *PI4KIIIβ*-GFP were treated for the indicated times with D-C6-Cer (10 $\mu$ M) lysed, and protein lysates were subjected to immunoprecipitation by the use of anti-GFP antibody, SDS-PAGE and Western Blotting. PKD dependent phosphorylation of *PI4KIIIβ* was revealed by pMOTIF antibody and compared to the amount of *PI4KIIIβ* (detected by anti-GFP antibody) immunoprecipitated at each time point. The PKD inhibitor Gö 6976 (10  $\mu$ M, pre treatment 1 hour) was used as a specificity control. **B)** Cells expressing *PI4KIIIβ*-GFP-wt (wt) or *PI4KIIIβ*-GFP-S294A mutant (S294A) were treated for the indicated times with D-C6-Cer (10 $\mu$ M) lysed, and protein lysates were subjected to immunoprecipitation by the use of anti-GFP antibody, SDS-PAGE and Western Blotting. PKD dependent phosphorylation of *PI4KIIIβ* was revealed by pMOTIF antibody and compared to the amount of *PI4KIIIβ* (detected by anti-GFP antibody) immunoprecipitated at each time point. **C)** Schematic representation of *SL* flow mediated phosphorylation of *PI4KIIIβ*.

# Appendix Figure S15

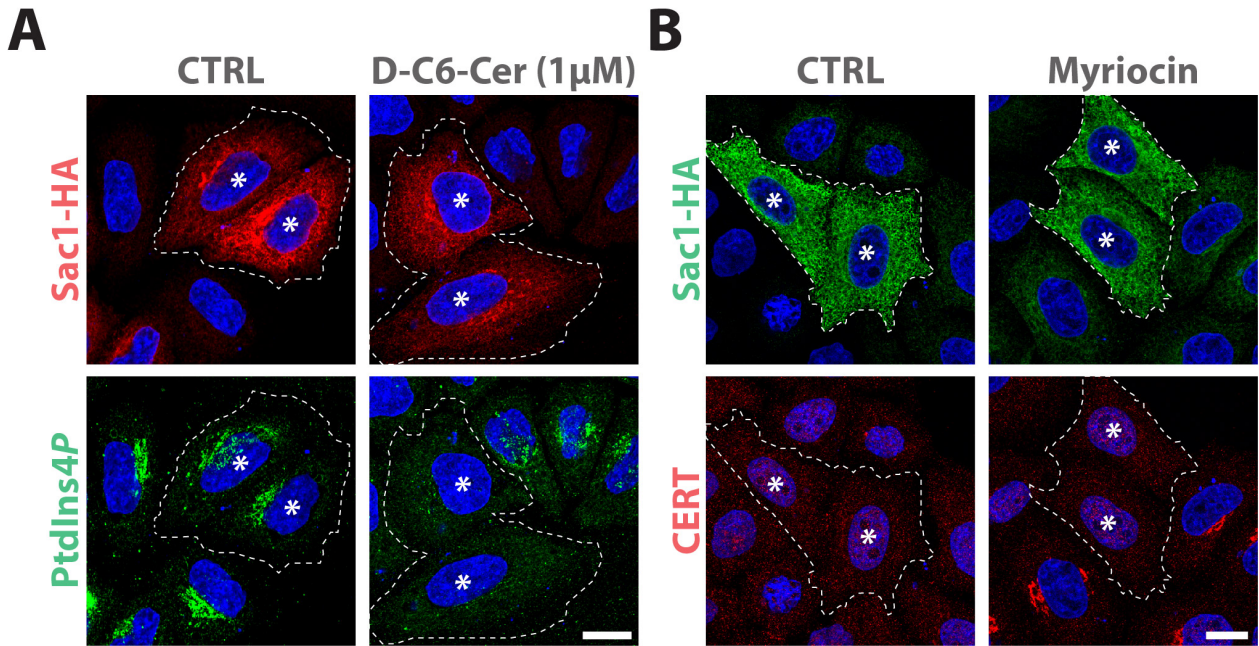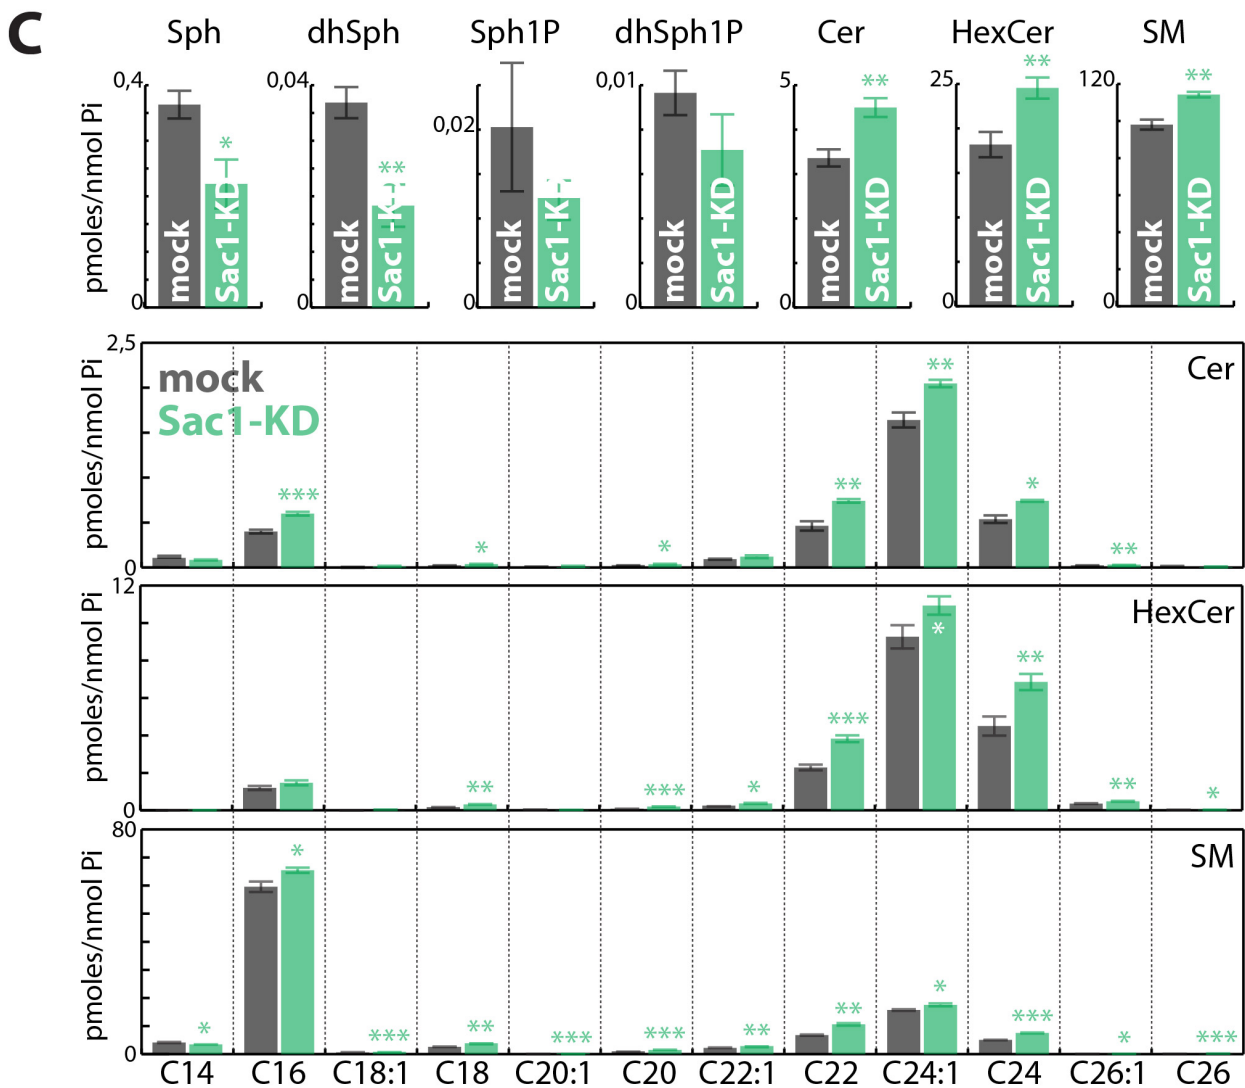



**Appendix figure S15: *Sac1* consumes *PtdIns(4)P* in response to sustained SL flow**

**A)** Cells expressing *Sac1*-HA (red) were treated with D-C6-Cer (1 $\mu$ M, 1 hour) and the *PtdIns(4)P* (green) levels at the TGN were evaluated. **B)** Cells expressing *Sac1*-HA (green) were treated with myriocin (2,5 $\mu$ M, 24 hours) and CERT (red) recruitment at the TGN was evaluated. Data are representative of at least three independent experiments. Bars, 10  $\mu$ m. **C)** HPLC-mass spectrometry based SL analysis of *Sac1*-KD cells. HeLa cells silenced for *Sac1* expression were subjected to lipid extraction, HPLC separation and SL analysis as detailed in **Methods**. Sph, sphingosine; dhSph, sphinganine; Sph1P, sphingosine-1-phosphate; dhSPh1P, sphinganine-1-phosphate; HexCer, hexosylceramide. Data are means  $\pm$  S.E.M. of 3 independent experiments.

## Appendix Figure S16

**A**

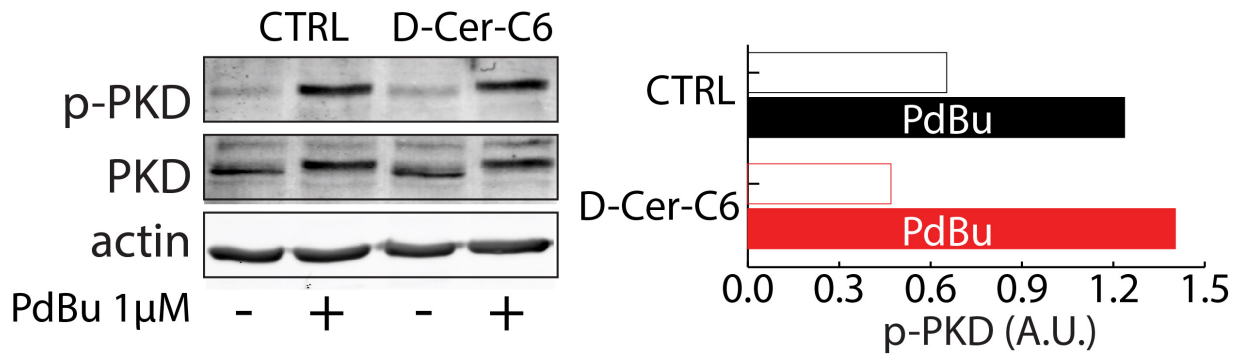

**B**

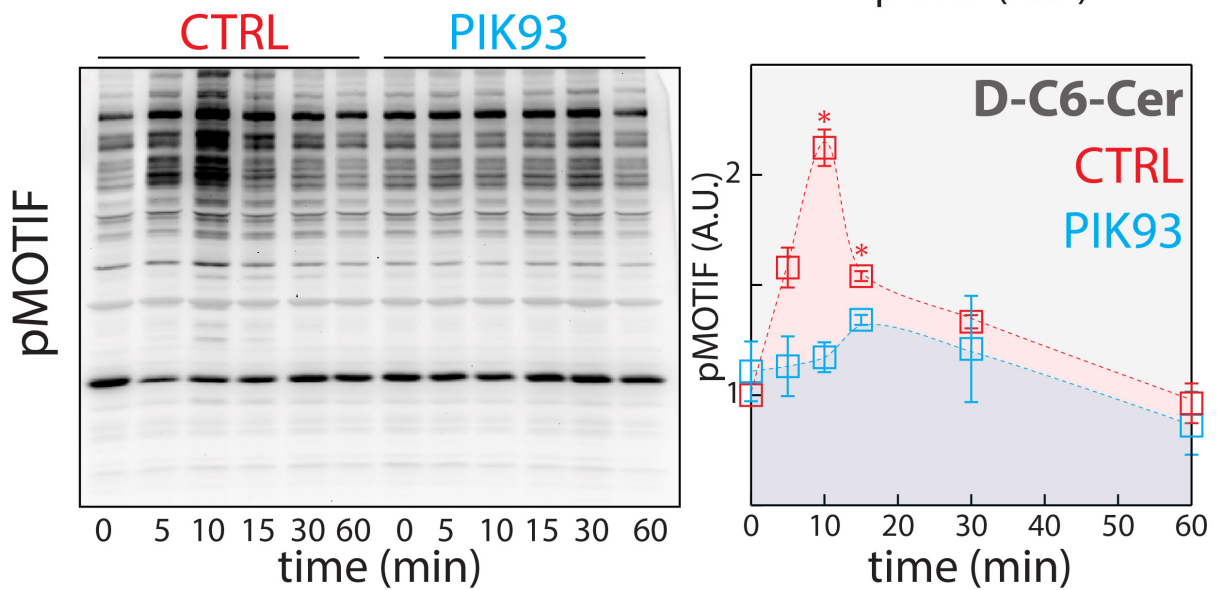

### Appendix figure S16: *PtdIns(4)P* consumption terminates PKD signalling

**A)** Cells pre-treated with vehicle (EtOH) or 10μM D-C6-Cer (10 μM) for 30 min were treated for 15 min with PdBu (1μM) lysed and lysates were processed for SDS-PAGE and Western Blotting. PKD activation expressed as normalized p-PKD signal is reported. **B)** HeLa cells pre-treated with vehicle (EtOH) or PIK93 (250nM) for 30 min were subjected to D-C6-Cer (10 μM) treatment for the indicated times, lysed and lysates were processed for SDS-PAGE and Western Blotting. pMOTIF antibody was used to monitor PKD activation (left panel). PKD activation in both control (CTRL; red) and PIK93 (cyan) treated cells was evaluated by quantitating phosphorylation of PKD substrates during D-C6-Cer (10μM) administration. Data are means of at least 3 independent experiments ± S.D..

## Appendix Table S1: List of the antibodies used in this study

| Antibody Name                         | Catalog number or PMID | Clone     | Company names     | Dilution |    |
|---------------------------------------|------------------------|-----------|-------------------|----------|----|
| anti-GFP                              | ab1218                 | 9F9.F9    | ABCAM             | 1:1000   |    |
| HA.11                                 |                        | 16B12     | COVANCE           | 1:1000   |    |
| Phospho-PKD (Ser916)                  | 2051                   |           | CELL SIGNALING    | 1:1000   | II |
| PKD                                   | 2052                   |           | CELL SIGNALING    | 1:1000   | II |
| Anti-(Ser/Thr) PKD substrate (pMOTIF) | 4381                   |           | CELL SIGNALING    | 1:1000   |    |
| GST                                   | PMID: 27398910         |           |                   | 1:5000   |    |
| GM130 (rabbit polyclonal)             |                        | EP892Y    | Abcam             | 1:500    |    |
| GM130 ( mouse monoclonal)             |                        | 35/GM130  | DB Bioscienze     | 1:100    |    |
| GOLGI97                               | A-21270                |           | Molecular Probe   | 1:100    |    |
| TGN46                                 | PMID:9084986           |           | BIO-RAD           | 1:100    |    |
| FAPP2                                 | PMID:17687330          |           |                   | 1:200    |    |
| PtdIns(4)P                            | PMID:19508231          |           | Echelon           | 1:200    |    |
| OSBP                                  | HPA039227              |           | Sigma-Aldrich     | 1:100    | II |
| CERT (COL4A3BP)                       | HPA035645              |           | Sigma-Aldrich     | 1:100    | II |
| M6PR                                  | PMID:22983091          |           | Novus Biologicals | 1:100    |    |
| EEA1                                  |                        | 1G11      | Abcam             | 1:100    |    |
| LAMP1                                 | ab24170                |           | Abcam             | 1:1000   |    |
| PDI                                   |                        | RL90      | Abcam             | 1:100    |    |
| Sec31A                                |                        | 32/Sec31A | DB Bioscienze     | 1:100    |    |
| P115                                  | ab184014               |           | Abcam             | 1:100    |    |
| GRASP65                               | ab30315                |           | Abcam             | 1:100    |    |
| Beta-COPI                             | PA1-061                |           | Thermo Fisher     | 1:100    |    |
| Giantin                               |                        | 9B6       | Abcam             | 1:100    |    |
| gamma-Adaptin                         |                        | 100/3     | Sigma-Aldrich     | 1:100    |    |
| Flag                                  |                        | M2        | Sigma-Aldrich     | 1:100    |    |
| myc                                   |                        | 4A6       | Sigma-Aldrich     | 1:1000   |    |
| PARP1                                 | 9542                   |           | CELL SIGNALING    | 1:1000   |    |
| GOLPH3 (rabbit polyclonal)            | ab98023                |           | Abcam             | 1:100    |    |
| GOLPH3 (mouse monoclonal)             | ab69171                |           | Abcam             | 1:100    | II |

  

| Antibody Name                                                   | Catalog number or PMID | Clone | Company names     | Dilution |
|-----------------------------------------------------------------|------------------------|-------|-------------------|----------|
| Transferrin From Human Serum, Alexa Fluor® 568 Conjugate        | T23365                 |       | Life Technologies | 1/400    |
| Donkey anti-Rabbit IgG (H+L) Alexa Fluor® 568 conjugate         | A10042                 |       | Life Technologies | 1/400    |
| Donkey anti-Sheep IgG (H+L) Alexa Fluor® 488 conjugate          | A11015                 |       | Life Technologies | 1/400    |
| Donkey anti-Mouse IgG (H+L) Alexa Fluor® 488 conjugate          | A21202                 |       | Life Technologies | 1/400    |
| Goat anti-Mouse IgM Alexa Fluor® 488 conjugate                  | A21042                 |       | Life Technologies | 1/400    |
| Goat anti-Mouse IgM(H+L) Alexa Fluor® 568 conjugate             | A21043                 |       | Life Technologies | 1/400    |
| Goat Anti-Rabbit IgG, H & L Chain Specific Peroxidase Conjugate | 401315                 |       | MerckMillipore    | 1/10000  |
| Goat Anti-Mouse IgG, H&L Chain Specific Peroxidase Conjugate    | 401215                 |       | MerckMillipore    | 1/10000  |

**Appendix Table S2:** Sequences of siRNAs used in this study

| siRNA               | siRNA sequence         |
|---------------------|------------------------|
| SMS1_1              | CUACACUCCCAGUACCUGG    |
| SMS1_2              | CACACUAUGGCCAAUCAGCAA  |
| GCS_1               | GAUAUGAAGUUGCAAAGUA    |
| GCS_2               | GCGAAUCCAUGACAAUUA     |
| GCS_3               | GGACCAAACUACGAAUUA     |
| GCS_4               | GAUGCUGAGAUUGUUUAUAG   |
| CERT_1              | GAAGAUGACUUUCCUACAA    |
| CERT_2              | GAAGUUGGCUGAAAUGGAA    |
| CERT_3              | GCGAGAGUAUCCUAAAUUU    |
| CERT_4              | UCAAAGGGAUAAAGUGGUA    |
| PKD1_1              | GAAGAGAUGUAGCUAUUAAUU  |
| PKD1_2              | GAAAGAGUGUUUGUUGUUAUU  |
| PKD1_3              | GAAUGCAGCUUUCAUGUAUUU  |
| PKD1_4              | GGAAGGAAAUAUCUCAUGAUU  |
| PKD2_1              | UGAGACACCUUCACUUCAUU   |
| PKD2_2              | CAAGAACAUUGUCCACUGUUU  |
| PKD2_3              | GGAAGAUGGGAGAGCGAUAAU  |
| PKD3_1              | GAACGAGUCUUUGUAGUAA    |
| PKD3_2              | GAAAGUCCACACACAUUU     |
| PKD3_3              | AAAUAACUGUAGUGGAGUA    |
| OSBP1_1             | UACUGGGAGUGUAAAGAAATT  |
| OSBP1_2             | CGAACGAGCCACACUCUUUAG  |
| OSBP1_3             | GCGAAAUUGAUUAUUGUGAAUC |
| PI4KII $\alpha$ _1  | GUAACUAUCUUGAAGGUUUUU  |
| PI4KII $\alpha$ _2  | AGAAAGGGAGUGAGGACUAUU  |
| PI4KII $\alpha$ _3  | GUGCAUAGCUCUCUGUAGAUU  |
| PI4KII $\alpha$ _4  | GAGACGAGCCCACUAGUGUUU  |
| PI4KIII $\alpha$ _1 | TCCGGACGCCATCCTCTTCTA  |
| PI4KIII $\alpha$ _2 | CAAGAAATCAGGCATGTCTAA  |
| PI4KIII $\alpha$ _3 | CCCGGAGCAACCTGGACATAA  |
| PI4KII $\beta$ _1   | ACCATTATTAGGGACCAGAAA  |
| PI4KII $\beta$ _2   | CAGAGTACTGGCCTTGTTCAA  |

|                    |                       |
|--------------------|-----------------------|
| PI4KII $\beta$ _3  | ATGAACTTTGTGCAAGATTTA |
| PI4KIII $\beta$ _1 | GGACGUGGGUGAUGCCAUUUU |
| PI4KIII $\beta$ _2 | GGAAUGACCUUCGGCAAGAUU |
| PI4KIII $\beta$ _3 | GAGAUCCGUUGCCUAGAUGUU |
| PI4KIII $\beta$ _4 | GCACCGAGAGUAUUGAUAAUU |
| SACM1L(SacI)_1     | AAGGACCAACUAAAACGUUAA |
| SACM1L(SacI)_2     | AACGGUAUGUAAGGUAGUAUA |
| SACM1L(SacI)_3     | CAGGUAGUUAUAGUACUCCAA |
| PLEKHA8(FAPP2)_1   | GAGAUAGACUGCAGCAUAUUU |
| PLEKHA8(FAPP2)_2   | GAAUUGAUGUGGGAACUUUUU |
| PLEKHA8(FAPP2)_3   | GAAAUCAACCUGUAAUACUUU |
| PLEKHA8(FAPP2)_4   | CCUAAGAAAUCCAACAGAAUU |



**Appendix Table S3:** Sequences of primers used for Real Time q-PCR in this study

| <b>Primer</b>        | <b>Sequence</b>                |
|----------------------|--------------------------------|
| HPRT1 -For-          | 5'- AGCTTGCTGGTGAAAAGGAC -3'   |
| HPRT1 -For-          | 5'- GTCAAGGGCATATCCAACAAC -3'  |
| PI4K2 $\alpha$ -For- | 5'- CCACTGAAGCATCCTGACTC -3'   |
| PI4K2 $\alpha$ -Rev- | 5'- GGGTCCGATATCTTTGGAAGG -3'  |
| PI4K2 $\beta$ -For-  | 5'- GGGTGCCTATCTTGTGGAC -3'    |
| PI4K2 $\beta$ -Rev-  | 5'- GCCTCTTGATTTTGCACGG -3'    |
| PI4K3 $\alpha$ -For- | 5'-ACTCCACTGCCTTTGACTAC -3'    |
| PI4K3 $\alpha$ -Rev- | 5'- GATGCTTATGTCTTCACGCAG -3'  |
| PI4K3 $\beta$ -For-  | 5'- CTCGGAAACACATGGACAAG -3'   |
| PI4K3 $\beta$ -Rev-  | 5'- TTTGAGGTTTTCGAATGGTGC -3'  |
| Sac1 -For-           | 5'- GCCATGCAGCTAACTTTGTAG -3'  |
| Sac1 -Rev-           | 5'- CTTGAGGTTTGGTCTTTGGG -3'   |
| SMS1-For-            | 5'- GCATTTCAACTGTTCTCCGAAG -3' |
| Sac1 -Rev-           | 5'- GATAGACAAGCCACCTCCAG -3'   |
| UGCG-For-            | 5'- TTCGGGTTTCGTCCTCTTC -3'    |
| UGCG-Rev-            | 5'- GCTTGCTATAAGGCTGTTTGTC-3'  |
