# Supplementary material
Source: PubMed Central journal article supplement (PMC5470045)
Supplement: EMBJ-36-1736-s002.pdf [file EMBJ-36-1736-s002.pdf]

## Expanded View Figures

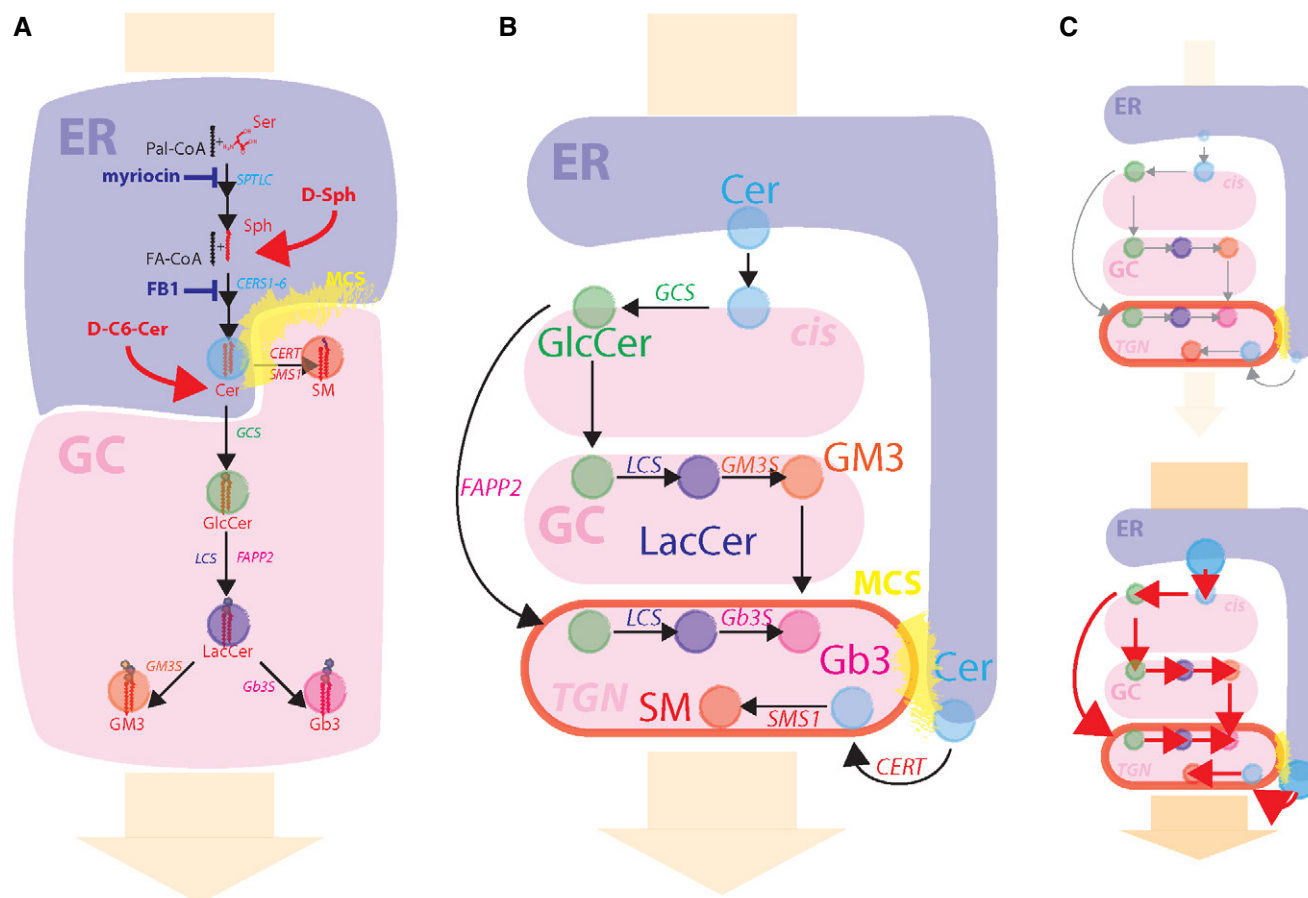

**Figure EV1. Intracellular organization of SL metabolism.**

- A Schematic representation of SL synthetic reactions happening at the ER (blue shaded area) and at the Golgi complex (GC; red shaded area). The metabolic positions where SL synthetic inhibitors act (blue) and where cell-permeable SL precursors enter SL metabolism (red) are indicated. The regions highlighted in yellow indicate ER–TGN MCSs. The orange arrow in the background indicates the direction of the biosynthetic flow.
- B Schematic representation of the sub-Golgi distribution of SL metabolic enzymes and associated reactions.
- C Experimental scheme for decreased (up) and increased (down) SL flow obtained by the use of cell-permeable SL precursors or SL synthetic inhibitors.

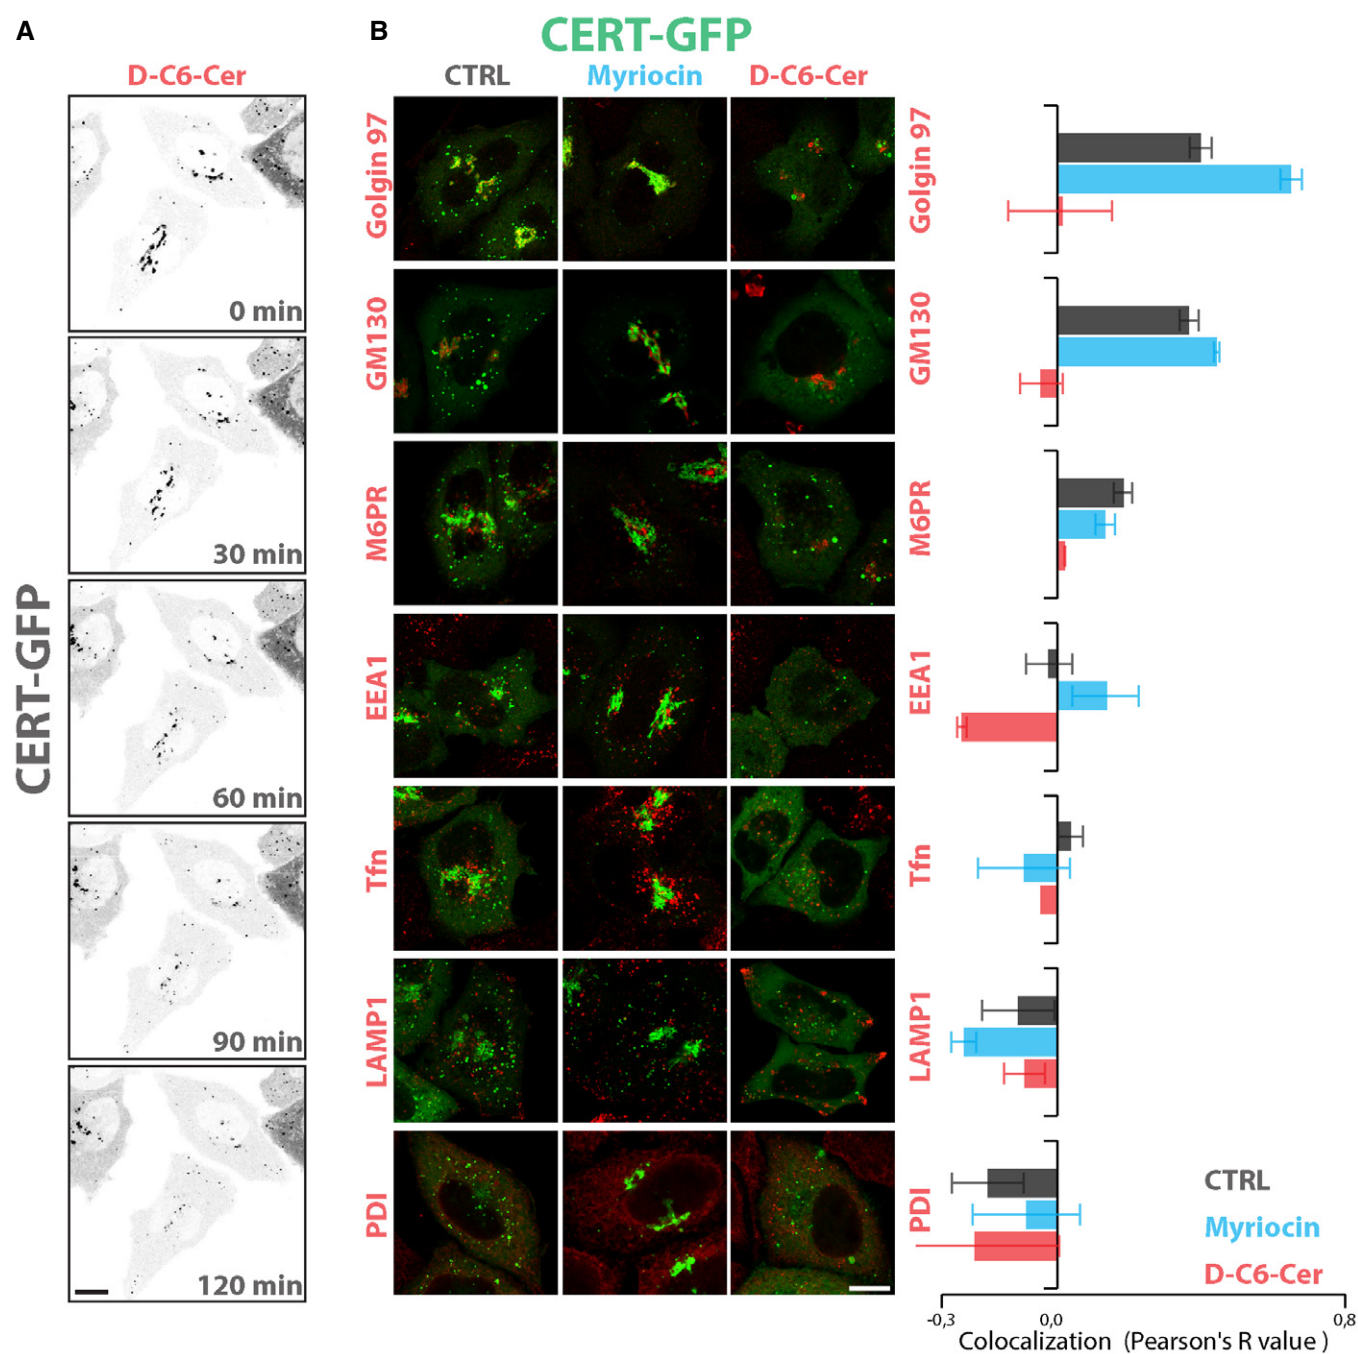

**Figure EV2. The association of GFP-CERT with TGN membranes depends on SL flow.**

**A** GFP-CERT localization in HeLa cells, pre-treated with myriocin (2.5  $\mu$ M, 24 h) and then treated with D-C6-Cer (10  $\mu$ M) for 2 h. Images are selected frames from Movie EV1. Scale bar, 10  $\mu$ m.

**B** GFP-CERT co-localization with the indicated organelle markers in HeLa cells either non-treated (CTRL, grey), treated with myriocin (2.5  $\mu$ M, 24 h) (myriocin, cyan) or pre-treated with myriocin (2.5  $\mu$ M, 24 h) and then treated with D-C6-Cer (10  $\mu$ M) for 2 h (D-C6-Cer; red). Left panels: representative images. Right panel: co-localization values calculated as Pearson's correlation coefficients (R-values) between GFP-CERT and the indicated markers under the different treatments. Scale bar, 10  $\mu$ m. Data are means  $\pm$  SEM from at least 3 independent experiments where at least 10 cells per experiment were considered.

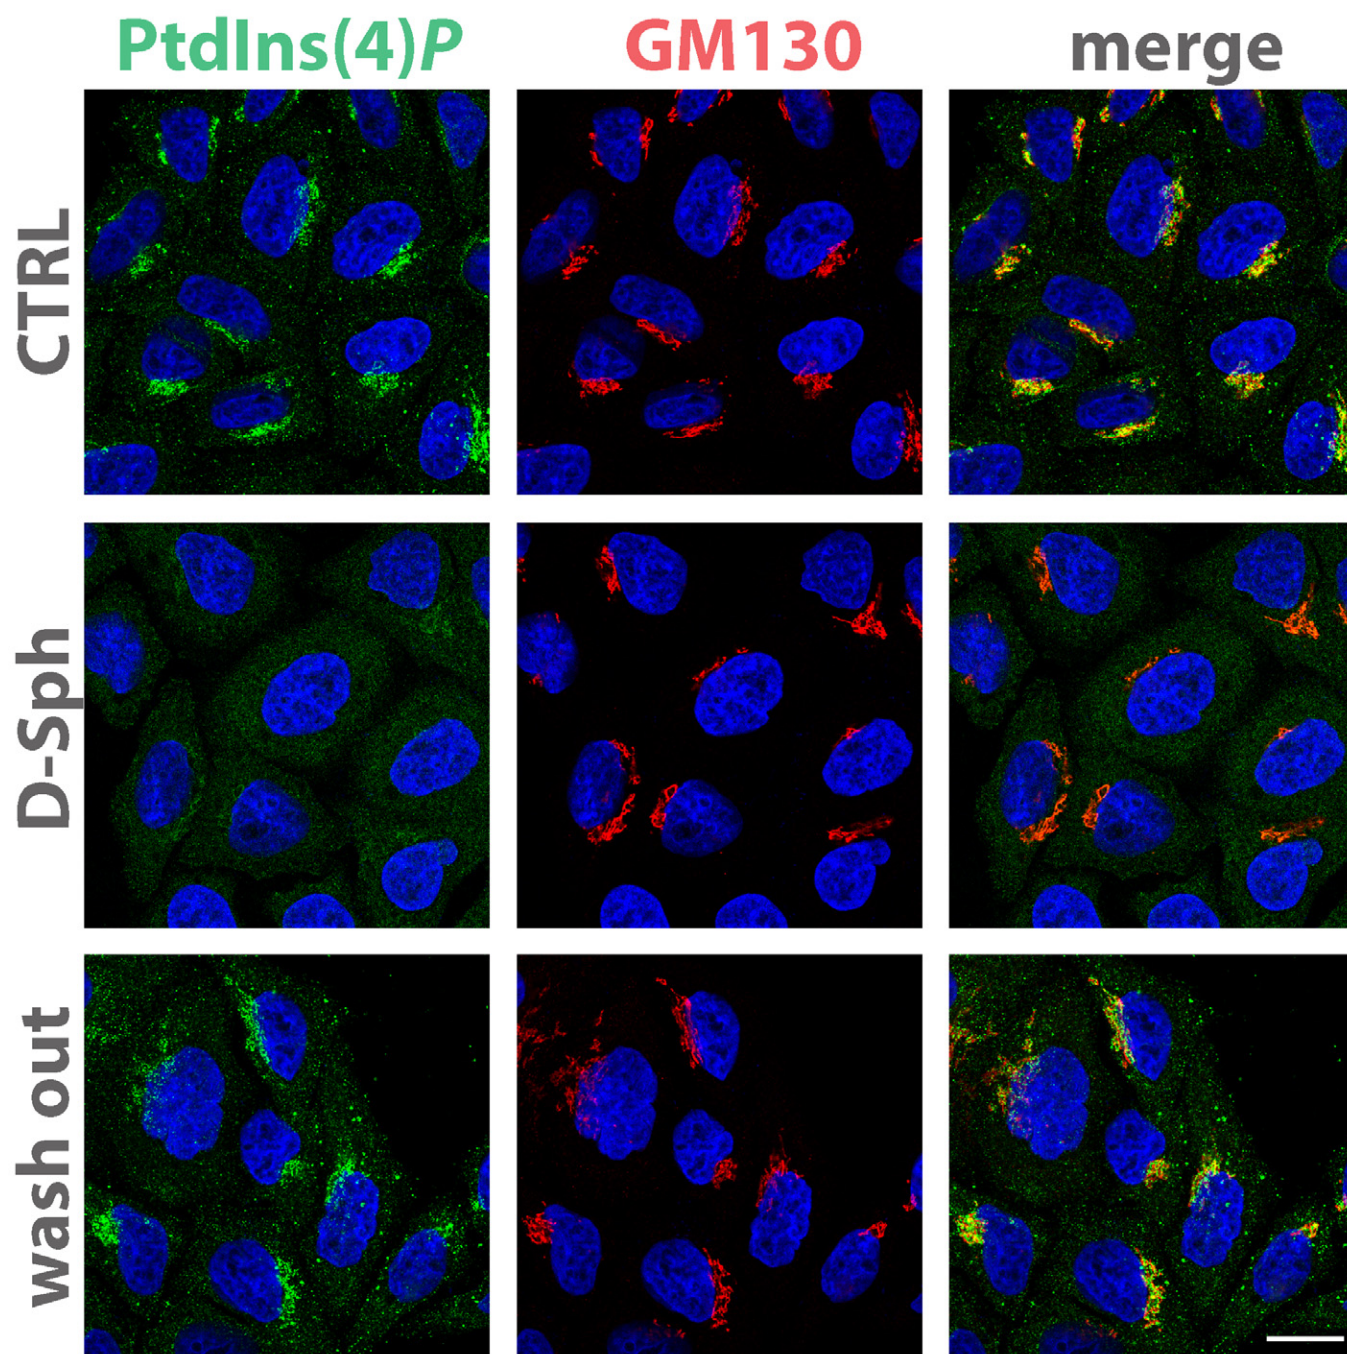

**Figure EV3.** SL flow controls PtdIns(4)P levels at the Golgi.

Cells treated either with vehicle (EtOH), with D-Sph (30  $\mu$ M) for 30 min or with D-Sph (30  $\mu$ M) and washed out for 4 h were fixed and permeabilized as in Fig 3A and stained with DAPI (blue), an anti-GM130 antibody (red) and anti-PtdIns(4)P antibody (green). Scale bar, 10  $\mu$ m.

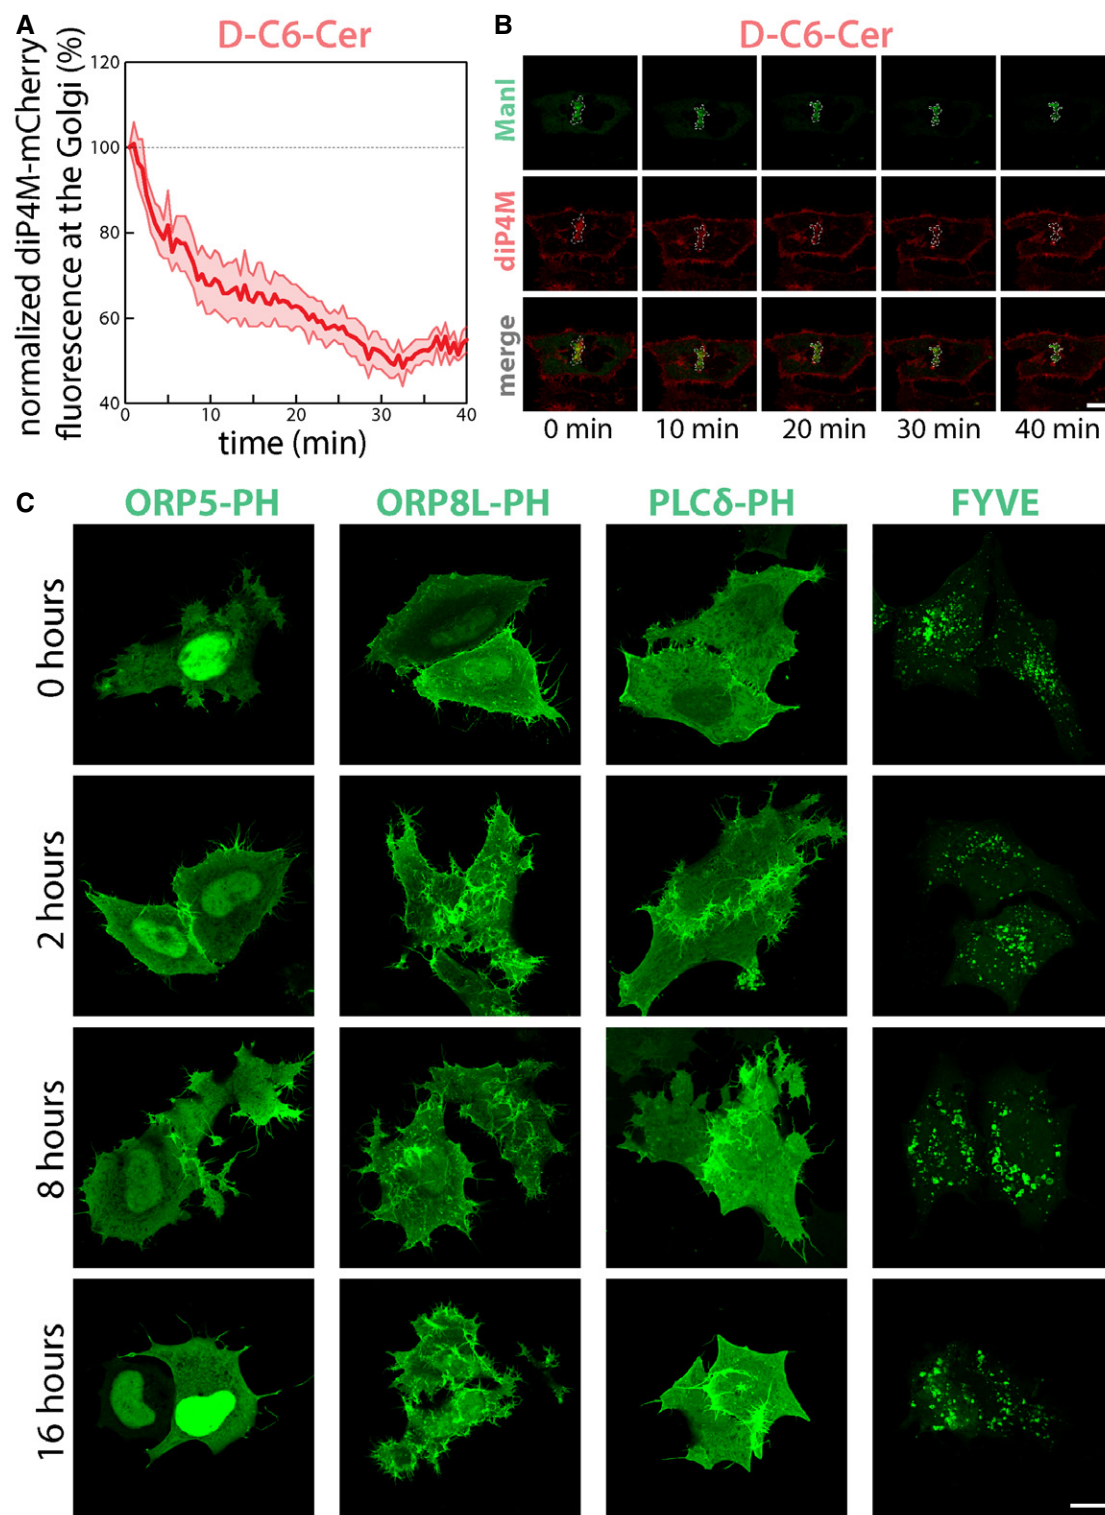

**Figure EV4. Sustained SL flow specifically controls PtdIns(4)P at the TGN.**

**A** HeLa cells transfected with plasmids encoding the PtdIns(4)P binding protein diP4M-SidM-mCherry (diP4M-mCherry, red) and the Golgi enzyme Man1-YFP (MAN1, green) were treated with D-C6-Cer (10  $\mu$ M) and imaged for the indicated time. The amount of diP4M-mCherry associated with the Golgi region was quantified. Data are mean  $\pm$  SEM.

**B** Selected frames from Movie EV6 are reported; dashed line indicates Golgi perimeter. Scale bar, 10  $\mu$ m.

**C** Cells transfected with GFP-tagged ORP5-PH, ORP8L-PH, PLCδ-PH or FYVE were treated with D-C6-Cer (10  $\mu$ M) for the indicated times, fixed and imaged. Scale bar, 10  $\mu$ m.

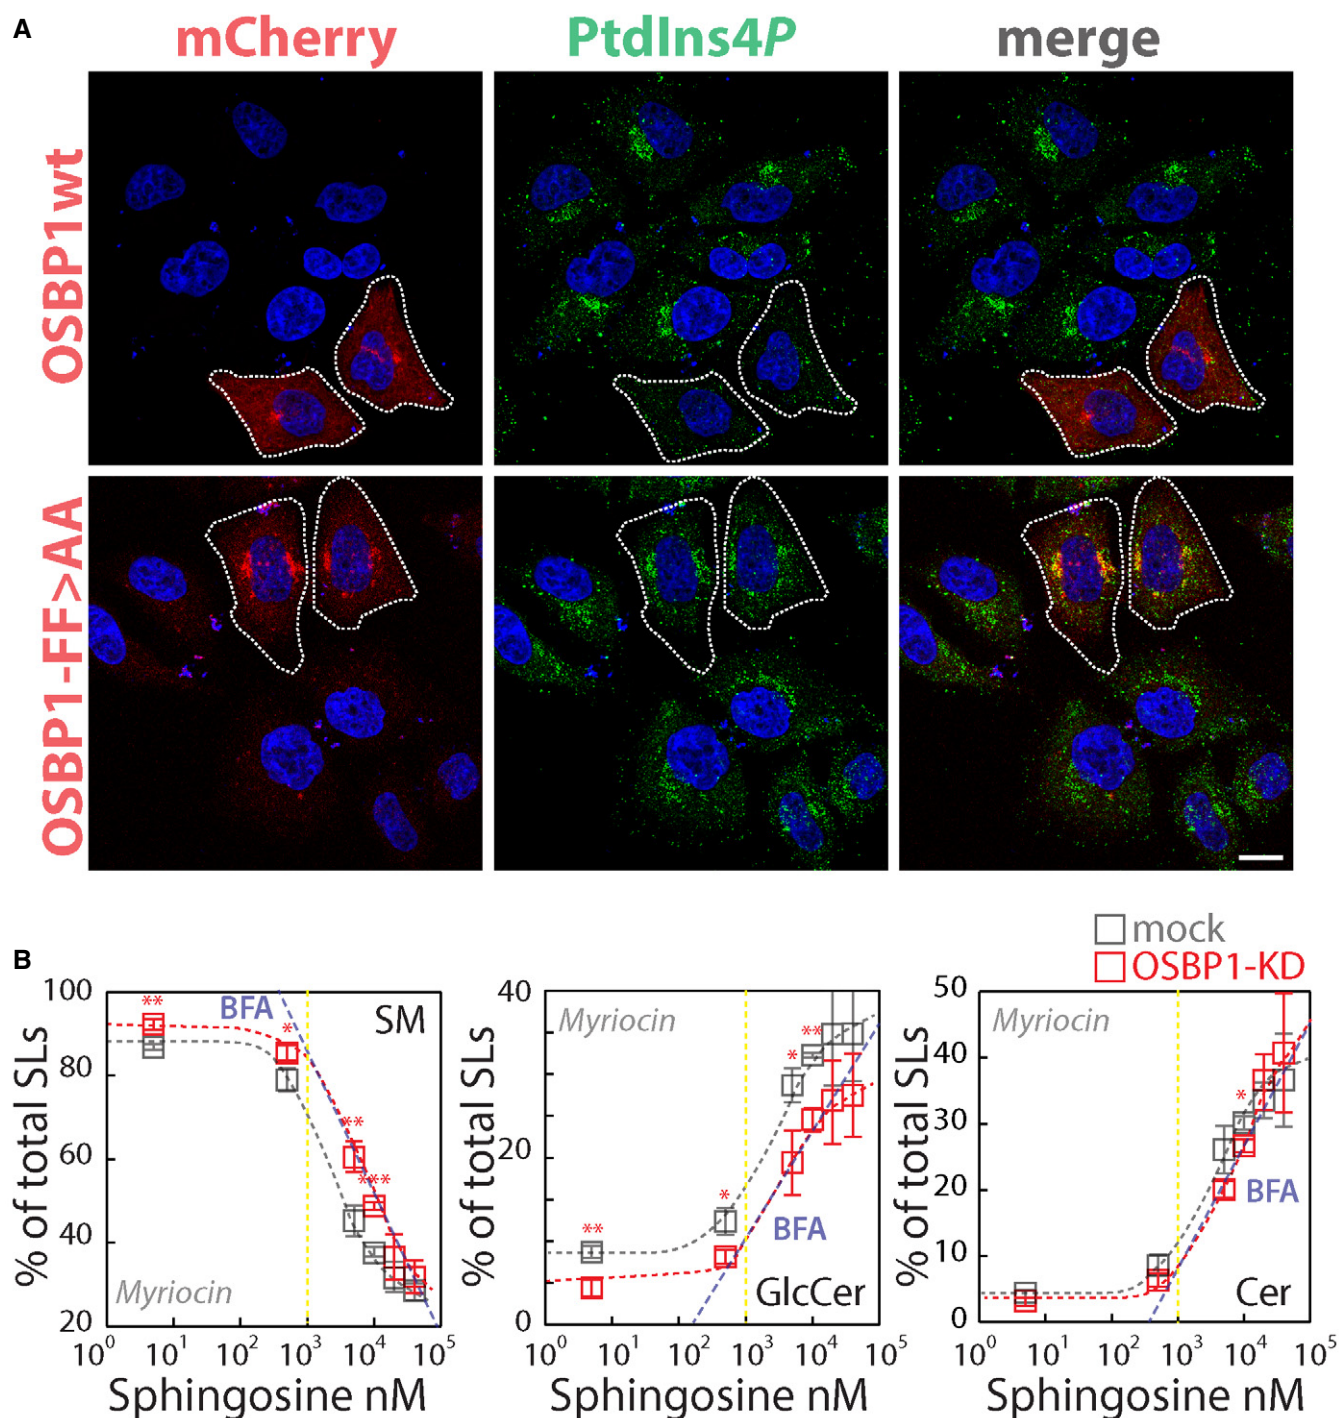

**Figure EV5. OSBP1 mediates PtdIns(4)P relocation to the ER to control SL homeostasis at the TGN.**

**A** Cells transiently expressing mCherry-OSBP1 wt or the mCherry-OSBP1-FF>AA mutant were fixed and permeabilized as in Fig 3 and stained with anti-PtdIns(4)P (green). The dashed line indicates mCherry-OSBP1-transfected cells. Scale bar, 10  $\mu$ m.

**B** Cells KD for OSBP1 were treated with myriocin (2.5  $\mu$ M) for 24 h and fed with increasing concentrations of D-Sph for 2 h.  $^3$ H-D-Sph ( $\approx$ 5 nM) was mixed as a tracer with its non-radioactive counterpart. The percentage of total radioactivity associated with SM (left panel), GlcCer (middle panel) and Cer (right panel) in mock (grey) and OSBP1-KD cells (red) was quantitated after lipid extraction and HPTLC separation. The blue dashed line represents the values obtained under BFA treatment (from Fig 1B). Data are means  $\pm$  SEM from at least 4 independent experiments. \*  $P < 0.05$ ; \*\*  $P < 0.01$ ; \*\*\*  $P < 0.001$ ; according to two-tailed Student's t-test.

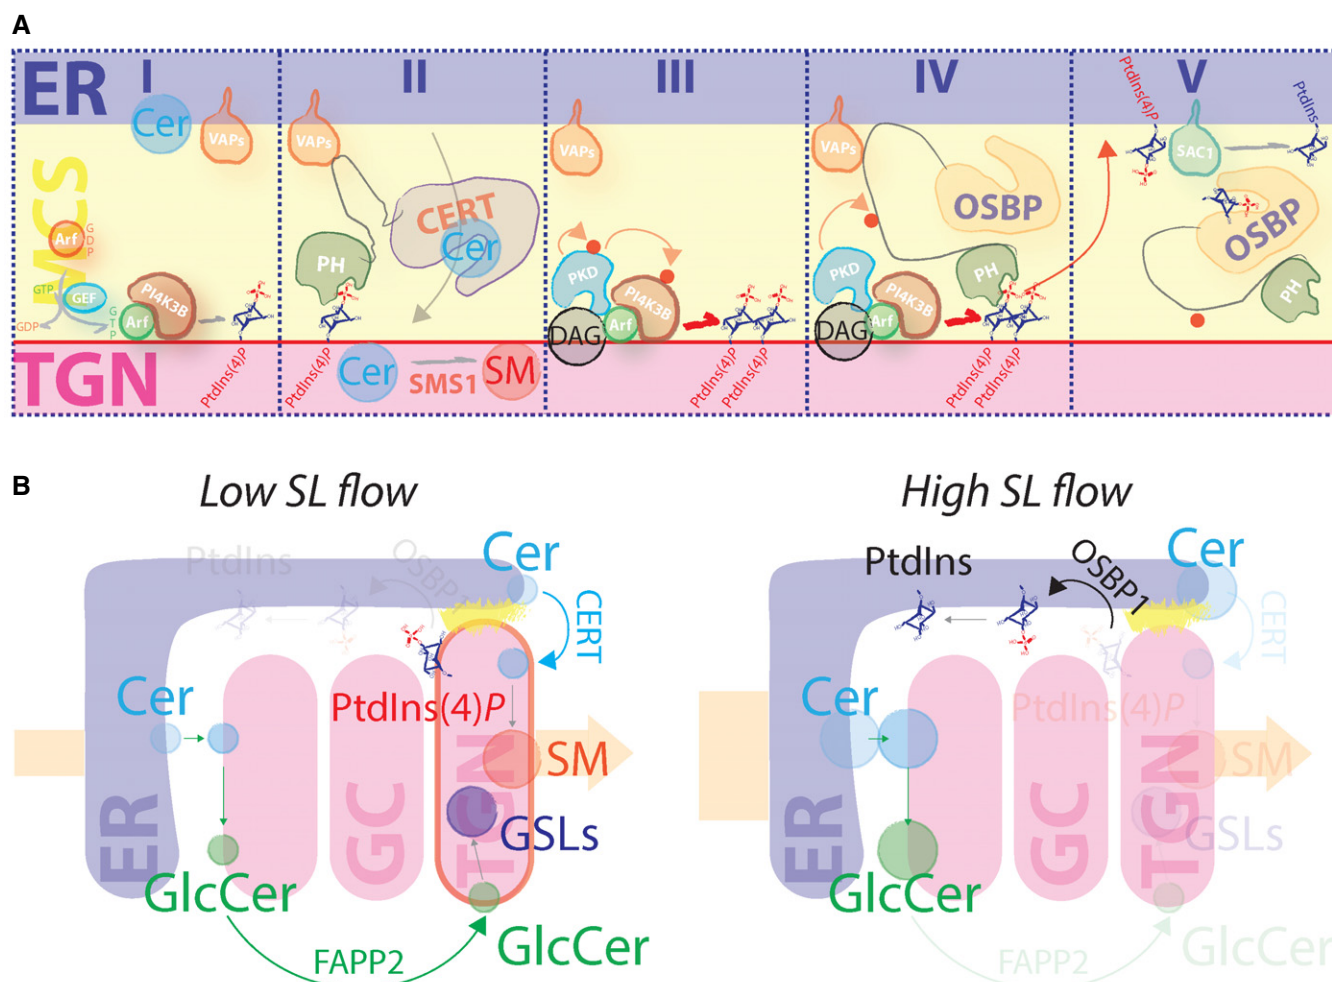

**Figure EV6. SL flow to the Golgi controls phosphoinositide turnover at the TGN.**

**A** Schematic representation of SL-controlled phosphoinositide turnover at the ER-TGN MCSs. Phase I: ARF1 recruits PI4KIIIβ to the TGN to produce PtdIns(4)P. Phase II: CERT transfers Cer from the ER to the TGN by contacting VAPs at the ER and PtdIns(4)P at the TGN. CERT-transferred Cer is converted to SM by SMS1. Phase III: SMS1-produced DAG recruits (together with ARF) and locally activates PKD. PKD phosphorylates itself and PI4KIIIβ to increase PtdIns(4)P production. Phase IV: OSBP1 is recruited by PtdIns(4)P. PKD phosphorylates OSBP1. Phase V: phospho-OSBP1 efficiently transfers PtdIns(4)P to the ER for its dephosphorylation operated by Sac1.

**B** Schematic representation of TGN response to sustained SL flow. At low SL flow (left scheme), Cer and GlcCer are efficiently transported to the TGN by the PtdIns(4)P binding proteins CERT and FAPP2, respectively, to yield SM and complex GSLs. At high SL flow (right scheme), PtdIns(4)P is transported to the ER by OSBP1 and dephosphorylated to PtdIns. As a consequence, CERT and FAPP2 cannot deliver further SL precursors (Cer and GlcCer) to the TGN, resulting in reduced production of SM and complex GSLs.
